# Supplementary material for: Novel health systems service design checklist to improve healthcare access for marginalised, underserved communities in Europe
Source: PubMed Central journal article supplement — BMJ Open. 2020 Apr 6;10(4):e035621. doi: 10.1136/bmjopen-2019-035621 (PMC7170642; doi:10.1136/bmjopen-2019-035621), 2020-04-06
Supplement: bmjopen-2019-035621.draft_revisions.pdf [file bmjopen-2019-035621.draft_revisions.pdf]

# BMJ Open

BMJ Open is committed to open peer review. As part of this commitment we make the peer review history of every article we publish publicly available.

When an article is published we post the peer reviewers' comments and the authors' responses online. We also post the versions of the paper that were used during peer review. These are the versions that the peer review comments apply to.

The versions of the paper that follow are the versions that were submitted during the peer review process. They are not the versions of record or the final published versions. They should not be cited or distributed as the published version of this manuscript.

BMJ Open is an open access journal and the full, final, typeset and author-corrected version of record of the manuscript is available on our site with no access controls, subscription charges or pay-per-view fees (<http://bmjopen.bmj.com>).

If you have any questions on BMJ Open's open peer review process please email [info.bmjopen@bmj.com](mailto:info.bmjopen@bmj.com)

# BMJ Open

## "A novel health systems service design checklist to improve healthcare access for marginalized, underserved communities in Europe"

|                                 |                                                                                                                                                                                                                                                                                                                                                                                                                                                                                             |
|---------------------------------|---------------------------------------------------------------------------------------------------------------------------------------------------------------------------------------------------------------------------------------------------------------------------------------------------------------------------------------------------------------------------------------------------------------------------------------------------------------------------------------------|
| Journal:                        | <i>BMJ Open</i>                                                                                                                                                                                                                                                                                                                                                                                                                                                                             |
| Manuscript ID                   | bmjopen-2019-035621.R1                                                                                                                                                                                                                                                                                                                                                                                                                                                                      |
| Article Type:                   | Communication                                                                                                                                                                                                                                                                                                                                                                                                                                                                               |
| Date Submitted by the Author:   | 14-Nov-2019                                                                                                                                                                                                                                                                                                                                                                                                                                                                                 |
| Complete List of Authors:       | Lazarus, Jeffrey; Barcelona Institute for Global Health, Hospital Clínic, University of Barcelona<br>Baker, Lee; Interel<br>Cascio, Mario ; European AIDS Treatment Group<br>Onyango, Denis ; Africa Advocacy Foundation<br>Schatz, Eberhard; Correlation European Harm Reduction Network<br>Smith, Alyna ; Platform for International Cooperation on Undocumented Migrants (PICUM)<br>Spinnewijn, Freek; FEANTSA - European Federation of National Organisations Working with the Homeless |
| <b>Primary Subject Heading</b>: | Health services research                                                                                                                                                                                                                                                                                                                                                                                                                                                                    |
| Secondary Subject Heading:      | Health policy                                                                                                                                                                                                                                                                                                                                                                                                                                                                               |
| Keywords:                       | Health policy < HEALTH SERVICES ADMINISTRATION & MANAGEMENT, Organisation of health services < HEALTH SERVICES ADMINISTRATION & MANAGEMENT, Quality in health care < HEALTH SERVICES ADMINISTRATION & MANAGEMENT, Public health < INFECTIOUS DISEASES                                                                                                                                                                                                                                       |
|                                 |                                                                                                                                                                                                                                                                                                                                                                                                                                                                                             |

SCHOLARONE™  
Manuscripts

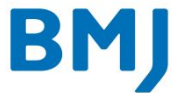

I, the Submitting Author has the right to grant and does grant on behalf of all authors of the Work (as defined in the below author licence), an exclusive licence and/or a non-exclusive licence for contributions from authors who are: i) UK Crown employees; ii) where BMJ has agreed a CC-BY licence shall apply, and/or iii) in accordance with the terms applicable for US Federal Government officers or employees acting as part of their official duties; on a worldwide, perpetual, irrevocable, royalty-free basis to BMJ Publishing Group Ltd ("BMJ") its licensees and where the relevant Journal is co-owned by BMJ to the co-owners of the Journal, to publish the Work in BMJ Open and any other BMJ products and to exploit all rights, as set out in our [licence](#).

The Submitting Author accepts and understands that any supply made under these terms is made by BMJ to the Submitting Author unless you are acting as an employee on behalf of your employer or a postgraduate student of an affiliated institution which is paying any applicable article publishing charge ("APC") for Open Access articles. Where the Submitting Author wishes to make the Work available on an Open Access basis (and intends to pay the relevant APC), the terms of reuse of such Open Access shall be governed by a Creative Commons licence – details of these licences and which [Creative Commons](#) licence will apply to this Work are set out in our licence referred to above.

Other than as permitted in any relevant BMJ Author's Self Archiving Policies, I confirm this Work has not been accepted for publication elsewhere, is not being considered for publication elsewhere and does not duplicate material already published. I confirm all authors consent to publication of this Work and authorise the granting of this licence.

1  
2  
3  
4 1 **A novel health systems service design checklist to improve healthcare access**  
5  
6  
7 2 **for marginalized, underserved communities in Europe**  
8  
9

10 3 Jeffrey V Lazarus,<sup>a</sup> Lee Baker<sup>b</sup>, Mario Cascio,<sup>c</sup> Denis Onyango,<sup>d</sup> Eberhard Schatz,<sup>e</sup> Alyna C Smith,<sup>f</sup>  
11  
12 4 Freek Spinnewijn,<sup>g</sup> on behalf of the Nobody Left Outside initiative  
13  
14

15 5 <sup>a</sup>Barcelona Institute for Global Health (ISGlobal), Hospital Clínic, University of Barcelona,  
16  
17 6 Barcelona, Spain  
18

19 7 <sup>b</sup>Interel, Brussels, Belgium  
20  
21

22 8 <sup>c</sup>European AIDS Treatment Group, Brussels Belgium  
23  
24

25 9 <sup>d</sup>Africa Advocacy Foundation, London, United Kingdom  
26  
27

28 10 <sup>e</sup>Correlation European Harm Reduction Network, Amsterdam, the Netherlands  
29

30 11 <sup>f</sup>Platform for International Cooperation on Undocumented Migrants (PICUM), Brussels, Belgium  
31  
32

33 12 <sup>g</sup>European Federation of National Organisations Working with the Homeless (FEANTSA), Brussels,  
34  
35 13 Belgium  
36

37 14 **Corresponding author:**

38  
39 15 Jeffrey Lazarus, Barcelona Institute for Global Health (ISGlobal), Hospital Clínic, University of  
40  
41 16 Barcelona, Calle de Rossellón 132, 4th floor, ES-08036, Barcelona, Spain.

42 17 [Jeffrey.Lazarus@isglobal.org](mailto:Jeffrey.Lazarus@isglobal.org)  
43  
44

45 18 **ORCID numbers**

46 19 Jeffrey V Lazarus: 0000-0001-9618-2299

47 20 Lee Baker: 0000-0001-5167-5305

48 21 Mario Cascio 0000-0001-6103-4130

49 22 Dennis Onyango: 0000-0002-5451-5419

50 23 Eberhard Schatz: 0000-0003-1636-790X

51 24 Alyna Smith: 0000-0002-3396-715X

52 25 Freek Spinnewijn: 0000-0002-2869-3385  
53  
54  
55

56 26 **Word count:** 3,412 (body text)

57  
58 27 **Keywords:** Health services, Marginalized populations, Monitoring and evaluation, People-centred  
59  
60 28 health systems, Europe

## 1 **Abstract**

### 2 **Background**

3 Marginalized communities such as the homeless, people who use drugs, lesbian, gay, bisexual,  
4 transgender and intersex people (LGBTI), prisoners, sex workers, and undocumented migrants are at  
5 high risk of poor health and yet face substantial barriers in accessing health and support services.

6 The Nobody Left Outside Service Design Checklist aims to promote a collaborative, evidence-based  
7 approach to service design and monitoring based on equity, non-discrimination and community  
8 engagement.

### 9 **Methods**

10 The NLO Checklist was devised through a three-step process: two NLO platform meetings informed  
11 by a literature review; a policy workshop and an associated published concept paper; and  
12 stakeholder consultation via a European Commission-led Thematic Network webinar and scientific  
13 conference presentation.

### 14 **Results**

15 The NLO Checklist is structured into six sections according to the World Health Organization (WHO)  
16 Health Systems Framework. These are: 1) service delivery, comprising design state (six items),  
17 services provided (two items), accessibility and adaptation (16 items), peer support (two items); 2)  
18 health workforce (12 items); 3) health information systems (seven items); 4) medical products and  
19 technologies (one item); 5) financing (three items); and 6) leadership and governance (seven items).  
20 It promotes the implementation of integrated (co-located or linked) healthcare services that are  
21 community-based and people-centred. These should provide a continuum of needs-based health  
22 promotion, disease prevention, diagnosis, treatment, and management, together with housing, legal  
23 and social support services, in alignment with the goals of universal health coverage and the WHO  
24 frameworks on integrated, people-centred healthcare.

## 1 **Conclusions**

2 The Checklist is offered as a practical tool to help overcome inequalities in access to health and  
3 support services. Policymakers, public health bodies, healthcare authorities, practitioner bodies,  
4 peer support workers and non-governmental organisations can use it when developing, updating or  
5 monitoring services for target groups. It may also assist civil society in wider advocacy efforts to  
6 improve access for underserved communities.

## 7 **Strengths and Limitations**

### 8 **Strengths:**

- 9 • The NLO Service Design Checklist is a versatile, easy-to-use, practical tool to help overcome  
10 inequalities in access to health and support services in alignment with principles of person-  
11 centricity and universal health coverage.
- 12 • The Checklist is broad in scope and hence applicable to services targeting multiple  
13 marginalized groups that often intersect and face common access barriers.
- 14 • The Checklist has been co-developed by organizations representing target communities and  
15 may help other advocacy organizations to collaboratively engage in service design and  
16 action plan formulation with key health agencies and health service providers.

### 17 **Limitations:**

- 18 • The Checklist is not universally applicable nor exhaustive.
- 19 • The Checklist has yet to be refined based on case studies of implementation.

## 20 **Background**

21 According to the principle of universal health coverage (UHC), all people should have access, without  
22 discrimination and exposure to financial hardship, to nationally determined, basic health services.<sup>1-2</sup>  
23 UHC encompasses health service delivery, human resources, health facilities, health technologies,  
24 information systems and communications networks, quality assurance mechanisms, governance and  
25 legislation, and financing.  
26

1  
2  
3 1 Even in the high-income countries of the European Union and the Organisation for Economic Co-  
4  
5 2 operation and Development (OECD) a large number of people are underserved by health systems.  
6  
7 3 This is particularly true for socially excluded people such as the homeless, people who use drugs  
8  
9 4 (PWUD), lesbian, gay, bisexual, transgender and intersex (LGBTI) people, prisoners, sex workers and  
10  
11 5 undocumented migrants. These communities are at a significantly higher risk of poor health than the  
12  
13 6 general population, owing to high levels of stress and precarious living conditions that can increase  
14  
15 7 their vulnerability to certain infectious diseases, such as HIV and viral hepatitis, mental health  
16  
17 8 conditions, maternal health problems, poor dental health and violence-related trauma.<sup>3-8</sup> Some  
18  
19 9 chronic non-communicable diseases (e.g. cardiovascular disease or cancer) are more common or  
20  
21 10 have worse outcomes in some marginalized groups (e.g. the homeless and prisoners), as compared  
22  
23 11 with the general population.<sup>3-5</sup>

24  
25  
26  
27  
28  
29 12 Despite their risks of poor health, these marginalized communities face substantial challenges in  
30  
31 13 accessing health and support services owing to a complex interplay of educational, cultural,  
32  
33 14 organizational, administrative, economic and legal barriers, together with widespread stigma and  
34  
35 15 institutional discrimination.<sup>6-11</sup> Their general exclusion from healthcare planning and monitoring  
36  
37 16 processes results in a misalignment between service design and the needs of target groups and  
38  
39 17 contributes to poor health outcomes.

40  
41  
42  
43 18 The Nobody Left Outside (NLO) initiative is a European coalition of organisations representing the  
44  
45 19 aforementioned communities. Despite the complexity of the challenges they face in accessing  
46  
47 20 services, NLO partners have worked to create a framework for the delivery of care in a way that  
48  
49 21 addresses many of the overlapping needs of these communities. A 2019 Thematic Network under  
50  
51 22 the Health Policy Platform of the European Commission (<https://webgate.ec.europa.eu/hpf/>), the  
52  
53 23 NLO coalition published a Joint Statement on priority measures to improve access to health and  
54  
55 24 support services in October 2019.<sup>12</sup> Here, we describe the NLO Service Design Checklist, a novel tool  
56  
57 25 to help key stakeholders tailor health services to marginalized communities.  
58  
59  
60

## 1 **Methods**

2 Representatives of communities to whom a service is targeted should be involved in service design,  
3 or redesign, to help ensure that it addresses relevant barriers to access. Accordingly, the NLO Service  
4 Design Checklist aims to promote a collaborative and evidence-based approach to service design and  
5 monitoring. It is intended to help service providers, monitoring and evaluation experts, policymakers  
6 and representatives of target communities (e.g. civil society organizations and patient groups) to  
7 design and deliver health and support services that are accessible to underserved, marginalized  
8 people.

9 The Checklist was devised through a three-step process: two NLO platform meetings informed by a  
10 literature review; a policy laboratory workshop at the European Health Forum Gastein 2017; and an  
11 associated concept paper.<sup>13</sup> Feedback was obtained from stakeholder organisations via a European  
12 Commission-led Thematic Network webinar<sup>14</sup> and an oral presentation at the International  
13 Conference on Integrated Care.<sup>15</sup>

14 It is structured into six sections according to the World Health Organization (WHO) Health Systems  
15 Framework: service delivery, health workforce, health information systems, medical products and  
16 technologies, financing, and leadership and governance (Figure 1).<sup>16</sup> It also aligns broadly with the  
17 principles of the European Framework for Action on Integrated Health Services Delivery<sup>17</sup> and other  
18 recommendations.<sup>9, 18-22</sup>

19 The Checklist serves as a guide and is not necessarily exhaustive. It will be freely available online (at  
20 [www.nobodyleftoutside.eu](http://www.nobodyleftoutside.eu)) as an open-access resource, supported by a guidance document. Users  
21 will be invited to report their experience and to provide feedback to help inform future editions.



# 1 Results

## 2 Service delivery

### 3 *Design stage*

4 Marginalized groups are often described as ‘hard to reach’, whereas from their perspective, it is  
5 frequently the services that are hard to reach. Section A (Table 1) aims to aid the design and delivery  
6 of easily accessible services that meet the needs of target communities. Specifically, it promotes the  
7 implementation of integrated, co-located or linked healthcare services that are people-centred and  
8 which provide a continuum of relevant services, according to users’ needs, as called for by the WHO  
9<sup>2</sup> and the OECD<sup>23</sup>. It aligns with the principles of disease- and population-specific, yet broadly  
10 applicable, WHO guidance on service design and delivery.<sup>9, 18, 24</sup>

11 Among key considerations, service design should be based on an up-to-date assessment of:

- 12 • The specific needs and size of target communities (Checklist item A2)
- 13 • Existing access barriers, identified in consultation with the target community (A3) and healthcare  
14 staff (A4)
- 15 • Latest evidence-based clinical practice guidelines or best practices (A5) and existing resources  
16 and skills within target communities (A6).

### 17 *Services provided*

18 Services targeting marginalized groups should provide convenient and efficient access to the range  
19 of health and social services needed by users (Table 2). Integrated (e.g. co-located or linked services)  
20 offer opportunities for multifaceted screening, care and support for health and social issues beyond  
21 the initial reason for contact, subject to individualized assessment (A8).

22 Harm reduction services (Table 2) are a priority among many marginalized communities and are  
23 essential to achieve the United Nations Sustainable Development Goals (SDGs) and WHO targets

1 relevant to HIV and viral hepatitis <sup>20-21</sup> and yet are limited in most countries and settings, e.g. prisons  
2 [8]. Other health services of particular relevance include vaccination, sexual and reproductive health,  
3 mental health, dental care and maternal health. Many of these services correspond to indicators  
4 proposed by WHO to measure UHC <sup>2</sup> and among vulnerable communities are often subject to  
5 variations in access within Europe.

6 Access should also be provided to housing, which has an extremely important yet widely neglected  
7 impact on healthcare access and outcomes. <sup>25</sup> Access to legal services can often be critical also, for  
8 example to undocumented migrants to help them understand their entitlement to care, to link them  
9 to the healthcare system where possible, and to facilitate regularization of their status. <sup>26</sup>

#### 10 *Accessibility and adaptation*

11 Services should be designed to be easy to access and use by target communities. Services targeting  
12 marginalized groups should be delivered primarily from community-based centres located  
13 conveniently for users, supported by mobile outreach units where appropriate, rather than hospital-  
14 based clinics (item A9). <sup>9, 18, 24</sup> Co-location of multiple services can further facilitate wider  
15 engagement and uptake. Target communities can play a key role in these services.

16 For example, PWUD – a population that is challenging to engage and retain in health services – often  
17 use and trust harm reduction services, particularly when staffed by peers; such services offer  
18 opportunities to provide wider healthcare, support and health education. <sup>18, 24</sup> Engagement in care  
19 for hepatitis C virus or HIV infection may in turn contribute to reducing risk behaviours and  
20 supporting harm reduction. The Checkpoint centres across Europe <sup>27</sup> and the 56 Dean Street clinic in  
21 London <sup>28</sup> offer examples of good practice in community-based HIV services targeting key  
22 populations. Service models specifically targeting the homeless include integrated multi-professional  
23 services within shelters or community-based outpatient clinics and mobile primary care outreach  
24 teams. <sup>29</sup>

1 Prisoners, unlike other underserved groups discussed here, are not 'hard to reach'. Prisons therefore  
2 represent an important opportunity for multifaceted public health interventions, for example  
3 voluntary testing and care for sexually transmitted infections and blood-borne viruses<sup>18, 20-21</sup> and  
4 inter alia care for dental and mental health issues.

5 Checklist items A10–23 (Table 1) offer various additional practical considerations to improve  
6 accessibility to target groups, including free-of-charge access, confidentiality or anonymity,  
7 convenient opening hours and measures to support informed decision-making by users. Methods to  
8 further promote and monitor service engagement and adherence include sign-posting within target  
9 communities (item A22) and peer support work by community members (A25–26). Digital health  
10 tools, especially mobile phone apps, also show promise for this purpose. For example, the Refaid  
11 app (<https://refaid.com>) shows migrants and refugees the location of nearby services.

## 12 **Health workforce**

13 Health and social care providers often lack up-to-date, evidence-based education and training to  
14 deal with the complex challenges faced by marginalized communities and may lack evidence-based  
15 guidance and support structures. Negative attitudes among health professionals towards  
16 marginalized groups can also be an important barrier to access and can compromise care. All staff  
17 members who serve such communities therefore require specific training on the health, social,  
18 economic and other relevant aspects necessary to enable them to effectively engage with and  
19 support service users (Table 3; items B1–B9). Better training of staff in non-health provider settings  
20 (such as homeless shelters) in such matters could also lead to earlier and better referrals to the  
21 healthcare system.

## 22 **Health information systems**

23 Accurate, relevant health information is required to support evidence-based policy and service  
24 design, and to ensure that services reach and benefit target communities. Numerous evidence gaps  
25 exist with respect to the effectiveness or cost-effectiveness of services for marginalized groups.

1 Collecting data regarding the health of marginalized people can be difficult and national data  
2 collection systems are limited and heterogeneous between countries<sup>6-7</sup>, hampering international  
3 comparisons and benchmarking as well as national policymaking.

4 The Checklist items in this section (Table 3) aim to ensure that suitable systems are in place to  
5 capture service users' feedback and measure service quality, and that community representatives  
6 are involved in this process.

### 7 **Medical products & technologies**

8 In 2017, 12 agencies of the United Nations called on member states to put in place guarantees  
9 against discrimination, as manifest when some individuals or groups are denied access to services  
10 that are otherwise available to others – a key barrier to the achievement of the SDGs.<sup>3</sup> For example,  
11 among PWUD and migrants in Europe, antiretroviral therapy for HIV is more likely to be delayed and  
12 to show worse outcomes as compared to the general population.<sup>30-31</sup> Other examples include the  
13 limited, uneven implementation of testing and evidence-based standard-of-care treatment for  
14 hepatitis C virus infection among prisoners and PWUD<sup>32</sup> and to address the high levels of non-  
15 communicable diseases among the homeless.<sup>3</sup>

16 Service design should be based on the fundamental principle of equity, whereby all protocols,  
17 guidelines and policies should provide all service users with the same access to medical products and  
18 technologies as everyone else, according to the best standard of care that is locally available (C1;  
19 Table 3).

### 20 **Financing**

21 Generally, healthcare interventions targeting underserved populations have been chronically  
22 underfunded and treated as short-term and isolated projects. Items in this section (Table 4)  
23 underscore that services should be adequately and sustainably financed based on an accurate, up-

1  
2  
3 1 to-date local needs assessment (E1) over a suitable timeframe, together with suitable impact  
4  
5 2 assessment.

6  
7  
8 3 Many states depend on donor funding to deliver some services targeting underserved groups – such  
9  
10 4 as national HIV, viral hepatitis and tuberculosis programmes. Where donors have withdrawn  
11  
12 5 support, it is vital that governments maintain equitable service delivery through sustainable health  
13  
14 6 financing systems to avoid detrimental effects on public health. <sup>21-22</sup>

15  
16  
17  
18 7 Health services for marginalized populations can be funded in a variety of ways, including by  
19  
20 8 municipal, regional, national, European Union and international funding sources. In some instances,  
21  
22 9 health can be funded through structural funds, which in the past have traditionally been associated  
23  
24 10 with infrastructure. This would allow for fundamental change rather than short-term projects.

25  
26  
27  
28 11 The value of investment in community-based services for underserved, marginalized people should  
29  
30 12 be considered from an intersectoral perspective, i.e. taking into account the broader benefits of such  
31  
32 13 services on public health objectives and social/welfare services (E3). Multifaceted community-based  
33  
34 14 services can facilitate early diagnosis and interventions that can reduce healthcare costs associated  
35  
36 15 with some key public health threats, while improving outcomes. For example, harm reduction  
37  
38 16 services to prevent bloodborne viruses are cost-effective. <sup>33</sup> In England, it is estimated that  
39  
40 17 preventing only 1% of cases annually would save £15–19 million, while the annual costs of late HIV  
41  
42 18 diagnosis are twice those of early diagnosis. <sup>34</sup> Policies and investment into harm reduction can also  
43  
44 19 deliver broader social benefits, such as lower levels of drug-related crime and reduced pressure on  
45  
46 20 healthcare and criminal justice systems.

47  
48  
49  
50  
51 21 Evidence also clearly indicates benefits health service utilization from housing assistance  
52  
53 22 for homeless people <sup>25, 35</sup> although housing stability can cause an initial spike in healthcare use by  
54  
55 23 allowing homeless people to properly connect with the health system. For example, housing  
56  
57 24 interventions not only improve HIV care access and outcomes, but can also prevent new infections,  
58  
59  
60

1 supporting a role in primary prevention.<sup>25</sup> Economic arguments also support the full provision of  
2 healthcare services for undocumented migrants, i.e. not only in order to fulfil equity principles and  
3 health objectives but also because timely provision of primary healthcare services is cost-saving over  
4 hospital care.<sup>6, 36–38</sup>

## 5 **Leadership and governance**

6 Governance to accelerate UHC involves transparent, inclusive and equitable decision-making  
7 processes that allow for the input of all stakeholders and which develop policies that perform  
8 effectively, reaching clear and measurable outcomes for all, building accountability and being  
9 fair.<sup>1</sup>The NLO Checklist (Table 4) is intended to promote the involvement of community  
10 representatives in the planning, delivery, leadership and governance of services (F1), in general  
11 alignment with recommendations.<sup>6-7, 9, 24</sup> Various strategies and tools can help empower community  
12 and patient populations toward this purpose.<sup>9, 24, 39</sup>

13 High-level political attention is needed to ensure that the appropriate legal frameworks are in place  
14 to support healthcare access for all. The rights of all individuals to access to preventive healthcare  
15 and to benefit from medical treatment under national laws and practices are enshrined in the  
16 Charter of Fundamental Rights of the European Union<sup>40</sup> and other international instruments.<sup>41-42</sup>  
17 Services should reflect international standards regarding human rights, equity, non-discrimination  
18 and confidentiality (F2). Inequities in healthcare access should be addressed as part of  
19 antidiscrimination and protective policies that foster a supportive legal framework and non-  
20 discriminatory policy environment (F3). A Joint United Nations statement has called for member  
21 states to review and repeal punitive laws proven to have negative health outcomes and that counter  
22 established public health evidence.<sup>43</sup> Notably, in May 2019, the WHO adopted a 5-year global action  
23 plan aiming to achieve UHC and the highest attainable standard of health for refugees and migrants  
24 together with host populations<sup>44</sup>, and G7 Health Ministers committed to improve healthcare access  
25 for all, including by strengthening primary healthcare.<sup>45</sup>

1  
2  
3 1 National disease-specific action plans are important to the achievement of SDGs, and yet are still not  
4  
5 2 present in many European Union countries, have important gaps, or frequently lack community  
6  
7 3 involvement.<sup>33</sup> Such national action plans are also important to tackle the broader deficits in access  
8  
9 4 in step with issues such as housing and other health determinants (F4).  
10  
11  
12  
13 5 Accountable, transparent leadership and governance is essential (F7). The call by the WHO Regional  
14  
15 6 Office for Europe call for enhanced national and local stewardship for implementation of the  
16  
17 7 strategies and action plans on migrant health<sup>6</sup>, and the recommendations by a Lancet Commission  
18  
19 8 for robust accountability and monitoring in the field of migrant health<sup>7</sup> also apply to those for other  
20  
21 9 marginalized communities. Notably, the 2018 Global Harm Reduction International study highlighted  
22  
23 10 poor transparency on harm reduction funding across Europe.<sup>46</sup>  
24  
25  
26  
27

## 28 11 **Discussion**

29  
30 12 Some of the people in Europe most in need of healthcare are amongst the least likely to receive it.  
31  
32 13 To fulfil their commitment to contribute to the health and wellbeing of all, and to reach the SDGs,  
33  
34 14 governments at all levels – national, regional and local – working together with civil society partners  
35  
36 15 – should ensure that nobody is left outside of their health system. Inequalities in access are not  
37  
38 16 inevitable and can be addressed by tailored, integrated service models. The NLO Service Design  
39  
40 17 Checklist is offered as a practical tool to support this process based on the principles of equity, non-  
41  
42 18 discrimination and community engagement.  
43  
44  
45  
46  
47 19 Checklists have been successfully applied for clinical purposes in various settings. Notably, the WHO  
48  
49 20 Surgical Safety Checklist has been associated with reductions in surgical mortality.<sup>47</sup> The scope of  
50  
51 21 our Checklist includes direct considerations for service designers and frontline providers, together  
52  
53 22 with wider aspects of policy, funding and governance. It shares many common aspects with the  
54  
55 23 WHO Checklist for the framework for action on integrated health services<sup>17</sup>, including needs  
56  
57 24 assessment, provision of a broad, multidisciplinary service, empowerment of target communities,  
58  
59  
60

1 workforce support, evidence generation on performance, and clear accountability. Our Checklist  
2 focuses on certain marginalized communities, as for example do the UNAIDs Checklist for  
3 community engagement in the implementation of guidelines on the sexual and reproductive rights  
4 of women living with HIV <sup>48</sup> and a Public Health England Checklist of questions for healthcare  
5 practitioners to consider when speaking to new migrant patients. <sup>49</sup>

6 While the NLO Checklist is broad in scope, it is designed to allow representatives of multiple  
7 marginalized groups that often intersect and face common access barriers to collaboratively inform  
8 service design. As such, the Checklist is not intended to be universally applicable, wholesale; rather,  
9 its different elements may be used for diverse purposes and adapted (with translation when  
10 needed) to particular settings. We encourage health service policymakers, public health bodies,  
11 healthcare practitioner bodies and NGOs at all levels to use the Checklist when developing, updating  
12 or monitoring national or regional action plans for target groups. It may also assist regional or local  
13 healthcare authorities, service managers, and frontline professionals and peer-support workers in  
14 the design, refinement or assessment of local services. The Checklist may also help organizations  
15 representing target communities to engage in service design and action plan formulation with the  
16 aforementioned bodies (proactively or via consultation processes), and in wider advocacy efforts to  
17 improve equitable access to health and support services.

## 18 **Conclusion**

19 The NLO Service Design Checklist is offered as a practical tool to help overcome Inequalities in access  
20 to health and support services. We encourage health service policymakers, public health bodies,  
21 healthcare authorities, healthcare practitioner bodies, peer support workers and non-governmental  
22 organisations to use it when developing, updating or monitoring action plans and local services for  
23 target groups. It may also assist civil society in wider advocacy efforts to improve access among  
24 underserved communities.



## 1 **Abbreviations**

- 2 HIV: human immunodeficiency virus.
- 3 LGBTI: lesbian, gay, bisexual, transgender and intersex
- 4 NLO: Nobody Left Outside.
- 5 OECD: Organisation for Economic Co-operation and Development.
- 6 PWUD: people who use drugs.
- 7 SDG: Sustainable Development Goal.
- 8 UHC: universal health coverage.
- 9 WHO: World Health Organization.

## 10 **Declarations**

### 11 **Ethics approval and consent to participate**

12 Not applicable.

### 13 **Consent for publication**

14 Not applicable.

### 15 **Availability of data and materials**

16 Not applicable.

### 17 **Competing interests**

18 JVL reports research grants from AbbVie, Gilead and MSD, outside of the submitted work. LB is an  
19 employee of Interel (Brussels, Belgium), which received fees from MSD as part of the grant supporting  
20 the NLO initiative. MC, DO, ACS, ES and FS declare that they have no competing interests.

## 1 **Funding**

2 The NLO initiative is supported by an unrestricted grant from MSD. JVL, MC, DO, ES, ACS, FS and the  
3 individuals listed under 'Acknowledgements' participated in the NLO initiative on a volunteer (i.e.  
4 non-remunerated) basis.

## 5 **Authors' contributions**

6 JVL, LB, MC ,DO, ES, ACS and FS, participated in the idea development, planning and creation of the  
7 NLO Service Design Checklist at NLO meetings and review cycles, including at the European Health  
8 Forum in Gastein. JVL and LB led the drafting of this paper. JVL and FS led a European Commission  
9 Thematic Network webinar to discuss the Checklist. All authors reviewed and contributed to each  
10 draft and approved the final draft.

## 11 **Licence Statement A**

12 I, the Submitting Author has the right to grant and does grant on behalf of all authors of the Work  
13 (as defined in the below author licence), an exclusive licence and/or a non-exclusive licence for  
14 contributions from authors who are: i) UK Crown employees; ii) where BMJ has agreed a CC-BY  
15 licence shall apply, and/or iii) in accordance with the terms applicable for US Federal Government  
16 officers or employees acting as part of their official duties; on a worldwide, perpetual, irrevocable,  
17 royalty-free basis to BMJ Publishing Group Ltd ("BMJ") its licensees and where the relevant Journal is  
18 co-owned by BMJ to the co-owners of the Journal, to publish the Work in BMJ Open and any other  
19 BMJ products and to exploit all rights, as set out in our licence.

20  
21 The Submitting Author accepts and understands that any supply made under these terms is made by  
22 BMJ to the Submitting Author unless you are acting as an employee on behalf of your employer or a  
23 postgraduate student of an affiliated institution which is paying any applicable article publishing  
24 charge ("APC") for Open Access articles. Where the Submitting Author wishes to make the Work  
25 available on an Open Access basis (and intends to pay the relevant APC), the terms of reuse of such

1  
2  
3 1 Open Access shall be governed by a Creative Commons licence – details of these licences and  
4  
5 2 which Creative Commons licence will apply to this Work are set out in our licence referred to above.  
6  
7

### 8 3 **Acknowledgements**

9  
10 4 Representatives of the following organizations participated in the NLO initiative toward  
11  
12 5 development of the Service Design Checklist: African Advocacy Foundation (AAF: Denis Onyango);  
13  
14 6 Barcelona Institute for Global Health (ISGlobal: Jeffrey V. Lazarus; Miguel Servet-funded associate  
15  
16 7 research professor); Correlation European Harm Reduction Network (Eberhard Schatz and Roberto  
17  
18 8 Perez Gayo); European AIDS Treatment Group (EATG: Mario Cascio and Ann-Isabelle Von Lingen);  
19  
20 9 European Federation of National Organisations Working with the Homeless (FEANTSA: Freek  
21  
22 10 Spinnewijn); European Association for the Study of the Liver (EASL: Fiona Godfrey); Hepatitis C Trust  
23  
24 11 (Rachel Halford); International Committee on the Rights of Sex Workers in Europe (ICRSE: Luca  
25  
26 12 Stevenson); International Lesbian, Gay, Bisexual, Trans and Intersex Association Europe (ILGA  
27  
28 13 Europe: Sophie Aujean and Katrin Hugendubel); Platform for International Cooperation on  
29  
30 14 Undocumented Migrants (PICUM: Alyna Smith).  
31  
32  
33  
34  
35

### 36 15 **References**

- 37  
38 16 1. Resolution adopted by the General Assembly on 12 December 2012: 67/81. Global health and  
39  
40 17 foreign policy. United Nations. 2013.  
41  
42 18 [https://www.un.org/en/ga/search/view\\_doc.asp?symbol=A/RES/67/81](https://www.un.org/en/ga/search/view_doc.asp?symbol=A/RES/67/81). Accessed 14 Jun 2019.  
43  
44  
45 19 2. Universal health coverage (UHC) website. World Health Organization.  
46  
47 20 [https://www.who.int/news-room/fact-sheets/detail/universal-health-coverage-\(uhc\)](https://www.who.int/news-room/fact-sheets/detail/universal-health-coverage-(uhc)). Accessed  
48  
49 21 14 Jun 2019.  
50  
51  
52 53 22 3. Fazel S, Geddes JR, Kushel M. The health of homeless people in high-income countries:  
54  
55 23 descriptive epidemiology, health consequences, and clinical and policy recommendations.  
56  
57 24 Lancet. 2014;384:1529–40.  
58  
59  
60

- 1 4. Fazel S, Baillargeon J. The health of prisoners. *Lancet*. 2011;377:956–65.
- 2 5. Aldridge RW, Story A, Hwang SW, Nordentoft M, Luchenski SA, Hartwell G, et al. Morbidity and  
3 mortality in homeless individuals, prisoners, sex workers, and individuals with substance use  
4 disorders in high-income countries: a systematic review and meta-analysis.  
5 *Lancet*. 2018;391:241–50.
- 6 6. World Health Organization Regional Office for Europe. Report on the health of refugees and  
7 migrants in the WHO European Region. No PUBLIC HEALTH without REFUGEE and MIGRANT  
8 HEALTH. 2018. [http://www.euro.who.int/\\_data/assets/pdf\\_file/0004/392773/ermh-eng.pdf](http://www.euro.who.int/_data/assets/pdf_file/0004/392773/ermh-eng.pdf).  
9 Accessed 14 Jun 2019].
- 10 7. Abubakar I, Aldridge RW, Devakumar D, Orcutt M, Burns R, Barreto M, et al. The UCL–Lancet  
11 Commission on Migration and Health: the health of a world on the move. *Lancet*.  
12 2018;392:2606–54.
- 13 8. Joint United Nations Programme on HIV/AIDS (UNAIDS). Health, rights and drugs. Harm  
14 reduction, decriminalization and zero discrimination for people who use drugs. 2019.  
15 [https://www.unaids.org/en/resources/documents/2019/JC2954\\_UNAIDS\\_drugs\\_report\\_2019](https://www.unaids.org/en/resources/documents/2019/JC2954_UNAIDS_drugs_report_2019).  
16 Accessed cited 14 Jun 2019.
- 17 9. World Health Organization, United Nations Population Fund, Joint United Nations Programme  
18 on HIV/AIDS, Global Network of Sex Work Projects, The World Bank. Implementing  
19 comprehensive HIV/STI programmes with sex workers: practical approaches from collaborative  
20 interventions. 2013.  
21 [https://apps.who.int/iris/bitstream/handle/10665/90000/9789241506182\\_eng.pdf?sequence=1](https://apps.who.int/iris/bitstream/handle/10665/90000/9789241506182_eng.pdf?sequence=1)  
22 . Accessed 14 Jun 2019.
- 23 10. Alencar Albuquerque G, de Lima Garcia C, da Silva Quirino G, Alves MJ, Belém JM, dos Santos  
24 Figueiredo FW, et al. Access to health services by lesbian, gay, bisexual, and transgender  
25 persons: systematic literature review. *BMC Int Health Hum Rights*. 2016;16:2.

- 1  
2  
3 1 11. Joint Action on HIV and Co-infection Prevention and Harm Reduction (HA-REACT). An  
4  
5 2 assessment of barriers to access to HIV and HCV services for people who inject drugs in Europe.  
6  
7 3 2019.  
8  
9 4 [https://www.hareact.eu/sites/default/files/HA%20REACT%20WP8\\_D1\\_report2019\\_FINAL.pdf](https://www.hareact.eu/sites/default/files/HA%20REACT%20WP8_D1_report2019_FINAL.pdf).  
10  
11 5 Accessed 14 Jun 2019.  
12  
13  
14  
15 6 12. Nobody Left Outside Thematic Network. Joint statement: Improving healthcare access for  
16  
17 7 marginalised people. 2019.  
18  
19 8 <http://nobodyleftoutside.eu/nlo-thematic-network/>  
20  
21  
22  
23 9 13. Onyango D, Schatz E, Lazarus JV. Taking a 'people-centred' approach to improving access to  
24  
25 10 health care for underserved communities in Europe. *Eurohealth* 2017;23:23–7.  
26  
27 11 [http://www.euro.who.int/\\_data/assets/pdf\\_file/0004/349393/EH\\_v23n3\\_WEB\\_Final\\_12.Sept.](http://www.euro.who.int/_data/assets/pdf_file/0004/349393/EH_v23n3_WEB_Final_12.Sept.2017.pdf?ua=1)  
28  
29 12 [2017.pdf?ua=1](http://www.euro.who.int/_data/assets/pdf_file/0004/349393/EH_v23n3_WEB_Final_12.Sept.2017.pdf?ua=1). Accessed 14 Jun 2019.  
30  
31  
32  
33 13 14. NLO Service Design Checklist – First webinar of the Thematic Network led by Nobody Left  
34  
35 14 Outside platform (NLO). Webinar presentation, 16 May 2019.  
36  
37 15 [https://ec.europa.eu/health/sites/health/files/policies/videos/20190516\\_en.mp4](https://ec.europa.eu/health/sites/health/files/policies/videos/20190516_en.mp4). Accessed 14 Jun  
38  
39 16 2019.  
40  
41  
42 17 15. Lazarus JV, Cascio M, Halford R, Onyango D, Schatz E, Smith A, et al.. Nobody Left Outside (NLO)  
43  
44 18 Checklist: Improving access to healthcare for vulnerable and underserved groups. *International*  
45  
46 19 *Journal of Integrated Care*. 2019;19(4):507.  
47  
48 20 <https://www.ijic.org/articles/abstract/10.5334/ijic.s3507/>  
49  
50  
51  
52 21 16. World Health Organization. Everybody business: strengthening health systems to improve health  
53  
54 22 outcomes: WHO's framework for action. 2007.  
55  
56 23 [https://www.who.int/healthsystems/strategy/everybodys\\_business.pdf](https://www.who.int/healthsystems/strategy/everybodys_business.pdf). Accessed 14 Jun 2019.  
57  
58  
59  
60

- 1  
2  
3 1 17. World Health Organization. Strengthening people-centred health systems in the WHO European  
4  
5 2 Region: Framework for action on integrated health services delivery. 2016.  
6  
7 3 [http://www.euro.who.int/\\_data/assets/pdf\\_file/0004/315787/66wd15e\\_FFA\\_IHSD\\_160535.pdf](http://www.euro.who.int/_data/assets/pdf_file/0004/315787/66wd15e_FFA_IHSD_160535.pdf?ua=1)  
8  
9 4 [f?ua=1](http://www.euro.who.int/_data/assets/pdf_file/0004/315787/66wd15e_FFA_IHSD_160535.pdf?ua=1). Accessed 14 Jun 2019.  
10  
11  
12 5 18. World Health Organization. Consolidated guidelines on HIV prevention, diagnosis, treatment and  
13  
14 6 care for key populations. 2016.  
15  
16 7 [https://apps.who.int/iris/bitstream/handle/10665/246200/9789241511124-](https://apps.who.int/iris/bitstream/handle/10665/246200/9789241511124-eng.pdf;jsessionid=01DC589F5EADDA2DD6E298ADC09B4301?sequence=1)  
17  
18 8 [eng.pdf;jsessionid=01DC589F5EADDA2DD6E298ADC09B4301?sequence=1](https://apps.who.int/iris/bitstream/handle/10665/246200/9789241511124-eng.pdf;jsessionid=01DC589F5EADDA2DD6E298ADC09B4301?sequence=1). Accessed 14 Jun  
19  
20 9 2019.  
21  
22  
23 10 19. World Health Organization Regional Office for Europe. Strategy and action plan for refugee and  
24  
25 11 migrant health in the WHO European Region. 2016.  
26  
27 12 [http://www.euro.who.int/\\_data/assets/pdf\\_file/0004/314725/66wd08e\\_MigrantHealthStrateg](http://www.euro.who.int/_data/assets/pdf_file/0004/314725/66wd08e_MigrantHealthStrategyActionPlan_160424.pdf)  
28  
29 13 [yActionPlan\\_160424.pdf](http://www.euro.who.int/_data/assets/pdf_file/0004/314725/66wd08e_MigrantHealthStrategyActionPlan_160424.pdf). Accessed 14 Jun 2019.  
30  
31  
32 14 20. World Health Organization Regional Office for Europe. Action plan for the health sector response  
33  
34 15 to viral hepatitis in the WHO European Region. 2017.  
35  
36 16 [http://www.euro.who.int/\\_data/assets/pdf\\_file/0008/357236/Hepatitis-9789289052870-](http://www.euro.who.int/_data/assets/pdf_file/0008/357236/Hepatitis-9789289052870-eng.pdf)  
37  
38 17 [eng.pdf](http://www.euro.who.int/_data/assets/pdf_file/0008/357236/Hepatitis-9789289052870-eng.pdf). Accessed 14 Jun 2019.  
39  
40  
41 18 21. World Health Organization Regional Office for Europe. Action plan for the health sector response  
42  
43 19 to HIV in the WHO European Region. 2017.  
44  
45 20 [http://www.euro.who.int/\\_data/assets/pdf\\_file/0007/357478/HIV-action-plan-en.pdf?ua=1](http://www.euro.who.int/_data/assets/pdf_file/0007/357478/HIV-action-plan-en.pdf?ua=1) .  
46  
47 21 Accessed 14 Jun 2019.  
48  
49  
50 22 22. Day E, Hellard M, Treloar C, Bruneau J, Martin NK, Øvrehus A, et al. International Network  
51  
52 23 on Hepatitis in Substance Users (INHSU). Hepatitis C elimination among people who inject drugs:  
53  
54 24 Challenges and recommendations for action within a health systems framework. *Liver*  
55  
56 25 *Int.* 2019;39:20–30.  
57  
58  
59  
60

- 1  
2  
3 1 23. Organisation for Economic Co-operation and Development (OECD). The next generation of  
4  
5 2 health reforms: ministerial statement. 2017.  
6  
7 3 <http://www.oecd.org/health/ministerial/ministerial-statement-2017.pdf>. Accessed 14 Jun 2019.  
8  
9  
10 4 24. United Nations Office on Drugs and Crime, International Network of People Who Use Drugs,  
11  
12 5 Joint United Nations Programme on HIV/AIDS, United Nations Development Programme, United  
13  
14 6 Nations Population Fund, World Health Organization, United States Agency for International  
15  
16 7 Development. Implementing comprehensive HIV and HCV programmes with people who inject  
17  
18 8 drugs: practical guidance for collaborative interventions. 2017.  
19  
20 9 [https://www.unaids.org/sites/default/files/media\\_asset/2017\\_HIV-HCV-programmes-people-](https://www.unaids.org/sites/default/files/media_asset/2017_HIV-HCV-programmes-people-who-inject-drugs_en.pdf)  
21  
22 10 [who-inject-drugs\\_en.pdf](https://www.unaids.org/sites/default/files/media_asset/2017_HIV-HCV-programmes-people-who-inject-drugs_en.pdf). Accessed 14 Jun 2019.  
23  
24  
25  
26 11 25. Baxter AJ, Tweed EJ, Katikireddi SV, Thomson H. Effects of Housing First approaches on health  
27  
28 12 and well-being of adults who are homeless or at risk of homelessness: systematic review and  
29  
30 13 meta-analysis of randomised controlled trials. *J Epidemiol Community Health*. 2019;73:379–87.  
31  
32  
33 14 26. Smith AC, Krieger C, Siciarek M. The role of cities in the integration of migrants: facilitating  
34  
35 15 access to healthcare for all. Chapter 6 In: Villa M, editor. *Global Cities and Integration. A*  
36  
37 16 *Challenge for the Future*. Milan: ISPI; 2018. P. 129–154.  
38  
39 17 [https://www.ispionline.it/sites/default/files/pubblicazioni/globalcities\\_web.pdf](https://www.ispionline.it/sites/default/files/pubblicazioni/globalcities_web.pdf). Accessed 14  
40  
41 18 Jun 2019.  
42  
43  
44  
45 19 27. Girometti N, McCormack S, Devitt E, Gedela K, Nwokolo N, Patel S, et al. Evolution of a pre-  
46  
47 20 exposure prophylaxis (PrEP) service in a community-located sexual health clinic: concise report  
48  
49 21 of the PrEPxpress. *Sex Health*. 2018;15:598–600.  
50  
51  
52 22 28. Nikolopoulos GK, Chanos S, Tsiptsias E, Hodges-Mameletzis I, Paraskeva D, Dedes N. HIV  
53  
54 23 incidence among men who have sex with men at a community-based facility in Greece. *Cent Eur*  
55  
56 24 *J Public Health*. 2019;27:54–57.  
57  
58  
59  
60

- 1  
2  
3 1 29. Jego M, Abcaya J, Ştefan DE, Calvet-Montredon C, Gentile S. Improving Health Care  
4 Management in Primary Care for Homeless People: A Literature Review. *Int J Environ Res Public*  
5 Health. 2018;15. Pii: E309.  
6  
7  
8  
9  
10 4 30. Saracino A, Lorenzini P, Lo Caputo, et al. Increased risk of virological failure to the first  
11 antiretroviral regimen in HIV-infected migrants compared to natives: data from the ICONA  
12 cohort. *Clin Microbiol Infect*. 2016;22:288.e.1-8.  
13  
14  
15  
16  
17 7 31. Saracino A, Zaccarelli M, Lorenzini P, Bandera A, Marchetti G, Castelli F, et al. Impact of social  
18 determinants on antiretroviral therapy access and outcomes entering the era of universal  
19 treatment for people living with HIV in Italy. *BMC Public Health*. 2018;18:870.  
20  
21  
22  
23  
24 10 32. Lazarus JV, Stumo SR, Harris M, Hendrickx G, Hetherington KL, Maticic M, et al; Hep-CORE Study  
25 Group. Hep-CORE: a cross-sectional study of the viral hepatitis policy environment reported by  
26 patient groups in 25 European countries in 2016 and 2017. *J Int AIDS Soc*. 2018;21 Suppl  
27 2:e25052.  
28  
29  
30  
31  
32  
33  
34 14 33. Platt L, Minozzi S, Reed J, Vickerman P, Hagan H, French C, et al. Needle and syringe programmes  
35 and opioid substitution therapy for preventing HCV transmission among people who inject  
36 drugs: findings from a Cochrane Review and meta-analysis. *Addiction*. 2018;113:545–63.  
37  
38  
39  
40  
41 17 34. National Institute for Health and Care Excellence. Resource impact report: HIV testing: increasing  
42 uptake among people who may have undiagnosed HIV (NG60). 2016.  
43  
44  
45 <https://www.nice.org.uk/guidance/ng60/resources/resource-impact-report-pdf-2727796141>.  
46  
47  
48 Accessed 14 Jun 2019.  
49  
50  
51 21 35. Lee CT, Winquist A, Wiewel EW, Braunstein S, Jordan HT, Gould LH, et al. Long-Term Supportive  
52 Housing is Associated with Decreased Risk for New HIV Diagnoses Among a Large Cohort  
53 of Homeless Persons in New York City. *AIDS Behav*. 2018;22:3083–90.  
54  
55  
56  
57  
58  
59  
60



- 1  
2  
3 1 36. Trummer U, Novak-Zezula S, Renner A-T, Wilczewska I. Cost analysis of health care provision for  
4  
5 2 migrants and ethnic minorities. Vienna: Equi-Health; 2015.  
6  
7 3 [https://eea.iom.int/sites/default/files/publication/document/Cost\\_analysis\\_of\\_health\\_care\\_pro](https://eea.iom.int/sites/default/files/publication/document/Cost_analysis_of_health_care_provision_for_irregular_migrants_and_EU_citizens_without_insurance.pdf)  
8  
9 vision\_for\_irregular\_migrants\_and\_EU\_citizens\_without\_insurance.pdf. Accessed 14 Jun 2019.  
10  
11  
12 5 37. Bozorgmehr K, Razum O. Effect of restricting access to health care on health expenditures  
13  
14 6 among asylum-seekers and refugees: a quasi-experimental study in Germany, 1994–2013. *PLoS*  
15  
16 *One*. 2015;10:e0131483.  
17  
18  
19 8 38. European Union Agency for Fundamental Rights. Cost of exclusion from healthcare. The case of  
20  
21 9 migrants in an irregular situation. 2015.  
22  
23 10 [https://fra.europa.eu/sites/default/files/fra\\_uploads/fra-2015-cost-healthcare\\_en.pdf](https://fra.europa.eu/sites/default/files/fra_uploads/fra-2015-cost-healthcare_en.pdf). Accessed  
24  
25 11 14 Jun 2019.  
26  
27  
28 12 39. Ferrer L. Engaging patients, carers and communities for the provision of co-ordinated/integrated  
29  
30 13 health services: strategies and tools. Copenhagen: World Health Organization Regional Office for  
31  
32 14 Europe. 2015. [http://www.euro.who.int/\\_data/assets/pdf\\_file/0004/290443/Engaging-](http://www.euro.who.int/_data/assets/pdf_file/0004/290443/Engaging-patients-carers-communities-provision-coordinated-integrated-health-services.pdf)  
33  
34 15 [patients-carers-communities-provision-coordinated-integrated-health-services.pdf](http://www.euro.who.int/_data/assets/pdf_file/0004/290443/Engaging-patients-carers-communities-provision-coordinated-integrated-health-services.pdf). Accessed 14  
35  
36 16 Jun 2019.  
37  
38  
39 17 40. European Commission. Charter of fundamental rights of the European Union (2012C 326/02).  
40  
41 18 2012. <https://eur-lex.europa.eu/legal-content/EN/TXT/?uri=CELEX:12012P/TXT>. Accessed 14 Jun  
42  
43 19 2019.  
44  
45  
46 20 41. World Medical Association. WMA Resolution on refugees and migrants. Adopted by the 67th  
47  
48 21 World Medical Assembly, Taipei, Taiwan, 2016. 2016. [https://www.wma.net/policies-post/wma-](https://www.wma.net/policies-post/wma-resolution-on-refugees-and-migrants/)  
49  
50 22 [resolution-on-refugees-and-migrants/](https://www.wma.net/policies-post/wma-resolution-on-refugees-and-migrants/). Accessed 14 Jun 2019.  
51  
52  
53 23 42. United Nations Committee on Economic, Social and Cultural Rights. Duties of States towards  
54  
55 24 refugees and migrants under the International Covenant on Economic, Social and Cultural Rights.  
56  
57 25 2017.  
58  
59  
60

1  
2  
3 1 <http://docstore.ohchr.org/SelfServices/FilesHandler.ashx?enc=4slQ6QSmlBEDzFEovLCuW1AVC1>  
4  
5 2 [NkPsgUedPIF1vfPMJbFePxX56jVyNBwivepPdIEe4%2BUb4qsdJhuBDpCRSOwCXPjZ7VN7SXN0oRo](http://docstore.ohchr.org/SelfServices/FilesHandler.ashx?enc=4slQ6QSmlBEDzFEovLCuW1AVC1)  
6  
7 3 [XkZhCuB9Z73iyU35LZveUjX0d7u](http://docstore.ohchr.org/SelfServices/FilesHandler.ashx?enc=4slQ6QSmlBEDzFEovLCuW1AVC1). Accessed 14 Jun 2019.  
8  
9

10 4 43. Joint United Nations statement on ending discrimination in health care settings. Joint United  
11  
12 Nations Programme on HIV/AIDS (UNAIDS), Office of the United Nations High Commissioner  
13 5  
14 for Refugees (UNHCR), United Nations Children's Fund (UNICEF), World Food Programme  
15 6  
16 (WFP), United Nations Development Programme (UNDP), United Nations Population Fund  
17 7  
18 (UNFPA), et al. 2017. [https://www.unaids.org/sites/default/files/media\\_asset/ending-](https://www.unaids.org/sites/default/files/media_asset/ending-discrimination-healthcare-settings_en.pdf)  
19 8  
20 [discrimination-healthcare-settings\\_en.pdf](https://www.unaids.org/sites/default/files/media_asset/ending-discrimination-healthcare-settings_en.pdf). Accessed 14 Jun 2019.  
21 9  
22

23  
24 10 44. World Health Organization. Promoting the health of refugees and migrants. Draft global  
25  
26 action plan 2019–2023. 72<sup>nd</sup> World Health Assembly. 2019.  
27 11  
28 [http://apps.who.int/gb/ebwha/pdf\\_files/WHA72/A72\\_25Rev1-en.pdf](http://apps.who.int/gb/ebwha/pdf_files/WHA72/A72_25Rev1-en.pdf). Accessed 14 Jun  
29 12  
30 2019.  
31 13  
32

33  
34 14 45. G7 Health Ministers. Ensuring access to health for all. 2019.  
35  
36 <https://www.elysee.fr/admin/upload/default/0001/05/59c3454ab28edc451be46e846b70dc>  
37 15  
38 [38a532db95.pdf](https://www.elysee.fr/admin/upload/default/0001/05/59c3454ab28edc451be46e846b70dc). Accessed 14 Jun 2019.  
39 16  
40

41 17 46. Stone K, Shirley-Beavan S. Global State of Harm Reduction 2018. London: Harm Reduction  
42  
43 International; 2018. <https://www.hri.global/global-state-harm-reduction-2018>. Accessed 14  
44 18  
45 Jun 2019.  
46 19  
47

48 20 47. GlobalSurg Collaborative. Pooled analysis of WHO Surgical Safety Checklist use and mortality  
49  
50 after emergency laparotomy. *Br J Surg*. 2019;106:e103–e112.  
51 21  
52

53 22 48. International Community of Women Living with HIV Latina, Sophia, Eurasian Women's  
54  
55 Network on AIDS, International Community of Women Living with HIV West Africa, MENA  
56 23  
57 Rosa, International Community of Women Living with HIV & AIDS Eastern Africa, et al.  
58 24  
59 Translating community research into global policy reform for national action: a checklist for  
60 25

community engagement to implement the who consolidated guideline on the sexual and reproductive health and rights of women living with HIV (3<sup>rd</sup> edition). 2018.

[https://www.unaids.org/sites/default/files/media\\_asset/who\\_srhr\\_guideline\\_checklist\\_en.pdf](https://www.unaids.org/sites/default/files/media_asset/who_srhr_guideline_checklist_en.pdf). Accessed 14 Jun 2019.

49. Public Health England. Assessing new patients from overseas: migrant health guide. 2019.

<https://www.gov.uk/guidance/assessing-new-patients-from-overseas-migrant-health-guide#checklist-for-new-migrant-patients>. Accessed 14 Jun 2019.

Table 1. Nobody Left Outside Service Design Checklist – section A: service delivery

| <b>A. Service delivery</b>                                                                                                                                                                                                        | Yes | No | Not relevant / Comments |
|-----------------------------------------------------------------------------------------------------------------------------------------------------------------------------------------------------------------------------------|-----|----|-------------------------|
| <b>Aim: Design and deliver an easily accessible service that meets the needs of the communities for whom it is intended.</b>                                                                                                      |     |    |                         |
| Relevance: Providers ✓✓ Policymakers ✓                                                                                                                                                                                            |     |    |                         |
| <b>DESIGN STAGE</b>                                                                                                                                                                                                               |     |    |                         |
| A1. Were community representatives involved in the design of the service?                                                                                                                                                         |     |    |                         |
| Has the design of the service taken into account the:                                                                                                                                                                             |     |    |                         |
| A2. Health and social care needs of the community?                                                                                                                                                                                |     |    |                         |
| A3. Existing barriers to service access for the community, identified by the community and/or service users?                                                                                                                      |     |    |                         |
| A4. Existing barriers identified by healthcare staff in delivering services to the community?                                                                                                                                     |     |    |                         |
| A5. Existing resources and skills within the community?                                                                                                                                                                           |     |    |                         |
| A6. Relevant clinical practice guidelines and/or best practices?                                                                                                                                                                  |     |    |                         |
|                                                                                                                                                                                                                                   |     |    |                         |
| <b>SERVICES PROVIDED</b>                                                                                                                                                                                                          |     |    |                         |
| A7. Does the service provide integrated access (co-located or linked) to the range of health services (including testing, treatment, prevention and supportive care), social services and legal services needed by the community? |     |    |                         |
| A8. Are the physical and psychological needs of each service user systematically assessed on an individualized basis and in an appropriate manner?                                                                                |     |    |                         |

|                                                                                                                                                                                                                                       |  |  |  |
|---------------------------------------------------------------------------------------------------------------------------------------------------------------------------------------------------------------------------------------|--|--|--|
|                                                                                                                                                                                                                                       |  |  |  |
| <b>ACCESSIBILITY AND ADAPTATION</b>                                                                                                                                                                                                   |  |  |  |
| Is the service made easy to access and use by the community by:                                                                                                                                                                       |  |  |  |
| A9. Providing community-based and/or mobile clinics?                                                                                                                                                                                  |  |  |  |
| A10. Having convenient opening hours?                                                                                                                                                                                                 |  |  |  |
| A11. Providing child-friendly waiting areas?                                                                                                                                                                                          |  |  |  |
| A12. Providing physical accessibility for people with reduced mobility?                                                                                                                                                               |  |  |  |
| A13. Providing accessible sex- or gender-segregated spaces and services that are safe and accessible for trans, non-binary and intersex persons?                                                                                      |  |  |  |
| A14. Being provided on an anonymous or confidential basis?                                                                                                                                                                            |  |  |  |
| A15. Not requiring users to provide formal identification to access the service?                                                                                                                                                      |  |  |  |
| A16. Being free-of-charge to users?                                                                                                                                                                                                   |  |  |  |
| A17. Providing user-friendly information in plain language on the available health, social and legal services and users' rights to access these, translated into relevant languages and sufficient for them to make informed choices? |  |  |  |
| A18. Being suitably tailored to be sensitive to users' culture, faith, gender, housing status and lifestyle?                                                                                                                          |  |  |  |
| A19. Allowing users the option to choose which gender of staff member they see?                                                                                                                                                       |  |  |  |
| A20. Providing trained interpreters for relevant languages during consultations?                                                                                                                                                      |  |  |  |
| A21. Offering users assistance with completing forms or other documents?                                                                                                                                                              |  |  |  |
| A22. Being promoted and signposted effectively within the community?                                                                                                                                                                  |  |  |  |
| A23. Providing incentives for users to use the service?                                                                                                                                                                               |  |  |  |
| A24. Using digital tools to help link people to care?                                                                                                                                                                                 |  |  |  |
|                                                                                                                                                                                                                                       |  |  |  |
| <b>PEER SUPPORT</b>                                                                                                                                                                                                                   |  |  |  |
| A25. Does the service use peer care and support by community members?                                                                                                                                                                 |  |  |  |
| A26. Are peer support workers adequately compensated for their services?                                                                                                                                                              |  |  |  |

1

1 Table 2. Range of services that may be required by people from marginalized, underserved  
 2 communities targeted by the Nobody Left Outside Service Design Checklist

|                                                                                                                                                       |  |
|-------------------------------------------------------------------------------------------------------------------------------------------------------|--|
| Harm reduction:                                                                                                                                       |  |
| • Opioid substitution therapy                                                                                                                         |  |
| • Needle and syringe exchange                                                                                                                         |  |
| • Alcohol and substance abuse interventions                                                                                                           |  |
| • Infectious diseases testing (with appropriate counselling), linked to treatment services – including for HIV, hepatitis B and C virus, tuberculosis |  |
| • Vaccination and other prevention approaches                                                                                                         |  |
| • Condom distribution                                                                                                                                 |  |
| • Wound care                                                                                                                                          |  |
| Other health services:                                                                                                                                |  |
| • Sexual and reproductive health services (including screening, diagnosis and treatment of sexually transmitted diseases, cervical cancer screening)  |  |
| • Dental care                                                                                                                                         |  |
| • Maternity care services (including conception and pregnancy care)                                                                                   |  |
| • Mental health services                                                                                                                              |  |
| • Health promotion education                                                                                                                          |  |
| Social and support services:                                                                                                                          |  |
| • Housing or shelter support                                                                                                                          |  |
| • Social and welfare services                                                                                                                         |  |
| • Legal support services                                                                                                                              |  |

3  
4

1  
2  
3 1 Table 3. Nobody Left Outside Service Design Checklist – section B (health workforce), C (health  
4 2 information systems) and D (medical products and technologies).  
5 3  
6

| <b>B. Health workforce</b>                                                                                                                             | Yes | No | Not relevant / Comments |
|--------------------------------------------------------------------------------------------------------------------------------------------------------|-----|----|-------------------------|
| <b>Aim: Prevent and address discrimination and ensure workforce is enabled to deliver the service.</b><br>Relevance: Providers ✓✓ Policymakers ~       |     |    |                         |
| Do <i>all</i> staff members receive education and training on:                                                                                         |     |    |                         |
| B1. Health and social care needs and challenges among underserved communities?                                                                         |     |    |                         |
| B2. Users' rights to health and social services, and principles of non-discriminatory equal access?                                                    |     |    |                         |
| B3. Sensitivity regarding relevant cultural, faith, gender and lifestyle matters among user communities?                                               |     |    |                         |
| B4. Communication skills (including appropriate terminology)?                                                                                          |     |    |                         |
| B5. Stress management?                                                                                                                                 |     |    |                         |
| B6. Conflict management?                                                                                                                               |     |    |                         |
| B7. Do healthcare staff receive suitable training to deliver the necessary services according to current evidence-based guidelines and best practices? |     |    |                         |
| B8. Is the training provided to healthcare staff accredited for continuing medical education (CME)?                                                    |     |    |                         |
| B9. Are peer support workers given suitable training to fulfil their roles?                                                                            |     |    |                         |
| B10: Are healthcare staff and peer support workers given peer-to-peer support, supervision or psychological aid, if necessary?                         |     |    |                         |
| Do workforce training programmes include contributions from:                                                                                           |     |    |                         |
| B11. Community representatives?                                                                                                                        |     |    |                         |
| B12. Professional peers ('champions')?                                                                                                                 |     |    |                         |
|                                                                                                                                                        |     |    |                         |
| <b>C. Health information systems</b>                                                                                                                   | Yes | No | Not relevant / Comments |
| <b>Aim: Check that the service is used by the community and meets users' needs.</b><br>Relevance: Providers ✓✓ Policymakers ✓                          |     |    |                         |
| C1. Are community representatives involved in how the service is assessed?                                                                             |     |    |                         |
| Are suitable systems in place to monitor the:                                                                                                          |     |    |                         |
| C2. Usage of the service by the communities?                                                                                                           |     |    |                         |
| C3. Quality and impact of the service provided?                                                                                                        |     |    |                         |
| C4. Is there a formal process to capture users' feedback on the service, including complaints?                                                         |     |    |                         |
| C5. Are feedback loops in place to ensure that monitoring and user feedback help to improve the service?                                               |     |    |                         |
| C6. Are data gathered (with consent and in a data protection-compliant manner) for research and advocacy purposes?                                     |     |    |                         |
| C7. Does the service apply quality standards?                                                                                                          |     |    |                         |
|                                                                                                                                                        |     |    |                         |

1  
2  
3  
4  
5  
6  
7  
8  
9  
10  
11  
12  
13  
14  
15  
16  
17  
18  
19  
20  
21  
22  
23  
24  
25  
26  
27  
28  
29  
30  
31  
32  
33  
34  
35  
36  
37  
38  
39  
40  
41  
42  
43  
44  
45  
46  
47  
48  
49  
50  
51  
52  
53  
54  
55  
56  
57  
58  
59  
60

| <b>D. Medical products &amp; technologies</b><br><b>Aim: Ensure that all service users have equitable access to care.</b><br>Relevance: Providers ✓✓ Policymakers ✓✓                                                                            | Yes | No | Not relevant /<br>Comments |
|-------------------------------------------------------------------------------------------------------------------------------------------------------------------------------------------------------------------------------------------------|-----|----|----------------------------|
| D1. Do care protocols, guidelines and policies provide all service users with equitable and barrier-free access to medical products and technologies according to the best possible, evidence-based standard of care that is locally available? |     |    |                            |

1

For peer review only

1  
2  
3 1 Table 4. Nobody Left Outside Service Design Checklist – section E (financing) and F (leadership and  
4 2 governance).  
5 3  
6

| <b>E. Financing</b><br><b>Aim: Ensure the service is adequately and sustainably resourced.</b><br><b>Relevance: Providers ✓ Policymakers ✓✓</b>                               | Yes | No | Not relevant / Comments |
|-------------------------------------------------------------------------------------------------------------------------------------------------------------------------------|-----|----|-------------------------|
| E1. Are services adequately financed based on an accurate, up-to-date local needs assessment?                                                                                 |     |    |                         |
| E2. Is the service sustainably financed for a suitable timeframe?                                                                                                             |     |    |                         |
| E3. Does service financing take an intersectoral perspective based on the needs of the community?                                                                             |     |    |                         |
|                                                                                                                                                                               |     |    |                         |
| <b>F. Leadership &amp; governance</b><br><b>Aim: Ensure service is suitably led and governed, with community involvement</b><br><b>Relevance: Providers ~ Policymakers ✓✓</b> |     |    |                         |
| F1. Are community representatives involved in the leadership and governance of the service?                                                                                   |     |    |                         |
| F2. Does the service reflect international standards regarding human rights, equity, non-discrimination and confidentiality?                                                  |     |    |                         |
| F3. Is there a supportive legal framework and policy environment?                                                                                                             |     |    |                         |
| F4. Is there a National Action Plan regarding health and social care for the community, developed with involvement of the community?                                          |     |    |                         |
| F5. Is the service operated under the Health authorities (rather than the Interior or Justice authorities)?                                                                   |     |    |                         |
| F6. Do Health and Social Services authorities, and relevant government agencies, collaborate in the delivery of the service?                                                  |     |    |                         |
| F7. Does the service have accountable, transparent leadership and governance?                                                                                                 |     |    |                         |

4



1  
2  
3  
4  
5  
6  
7  
8  
9  
10  
11  
12  
13  
14  
15  
16  
17  
18  
19  
20  
21  
22  
23  
24  
25  
26  
27  
28  
29  
30  
31  
32  
33  
34  
35  
36  
37  
38  
39  
40  
41  
42  
43  
44  
45  
46  
47  
48  
49  
50  
51  
52  
53  
54  
55  
56  
57  
58  
59  
60

1 **Figure legend**

2 Figure 1. Schematic overview of Nobody Left Outside (NLO) Service Design Checklist, based on the  
3 World Health Organization Health Systems Framework. <sup>16</sup>

For peer review only

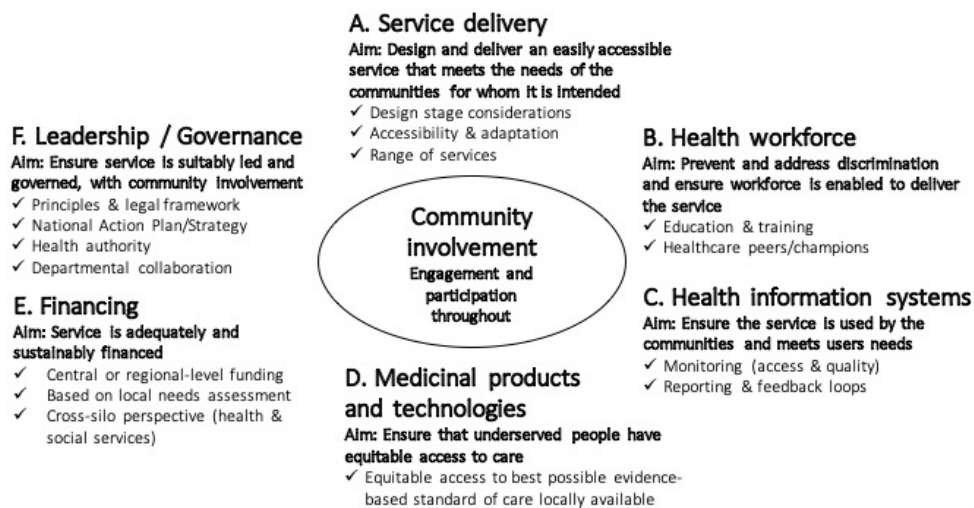

Caption : Figure 1. Schematic overview of Nobody Left Outside (NLO) Service Design Checklist, based on the World Health Organization Health Systems Framework [16]

240x125mm (72 x 72 DPI)

# BMJ Open

## "A novel health systems service design checklist to improve healthcare access for marginalized, underserved communities in Europe"

|                                 |                                                                                                                                                                                                                                                                                                                                                                                                                                                                                             |
|---------------------------------|---------------------------------------------------------------------------------------------------------------------------------------------------------------------------------------------------------------------------------------------------------------------------------------------------------------------------------------------------------------------------------------------------------------------------------------------------------------------------------------------|
| Journal:                        | <i>BMJ Open</i>                                                                                                                                                                                                                                                                                                                                                                                                                                                                             |
| Manuscript ID                   | bmjopen-2019-035621.R2                                                                                                                                                                                                                                                                                                                                                                                                                                                                      |
| Article Type:                   | Communication                                                                                                                                                                                                                                                                                                                                                                                                                                                                               |
| Date Submitted by the Author:   | 14-Feb-2020                                                                                                                                                                                                                                                                                                                                                                                                                                                                                 |
| Complete List of Authors:       | Lazarus, Jeffrey; Barcelona Institute for Global Health, Hospital Clínic, University of Barcelona<br>Baker, Lee; Interel<br>Cascio, Mario ; European AIDS Treatment Group<br>Onyango, Denis ; Africa Advocacy Foundation<br>Schatz, Eberhard; Correlation European Harm Reduction Network<br>Smith, Alyna ; Platform for International Cooperation on Undocumented Migrants (PICUM)<br>Spinnewijn, Freek; FEANTSA - European Federation of National Organisations Working with the Homeless |
| <b>Primary Subject Heading</b>: | Health services research                                                                                                                                                                                                                                                                                                                                                                                                                                                                    |
| Secondary Subject Heading:      | Health policy                                                                                                                                                                                                                                                                                                                                                                                                                                                                               |
| Keywords:                       | Health policy < HEALTH SERVICES ADMINISTRATION & MANAGEMENT, Organisation of health services < HEALTH SERVICES ADMINISTRATION & MANAGEMENT, Quality in health care < HEALTH SERVICES ADMINISTRATION & MANAGEMENT, Public health < INFECTIOUS DISEASES                                                                                                                                                                                                                                       |
|                                 |                                                                                                                                                                                                                                                                                                                                                                                                                                                                                             |

SCHOLARONE™  
Manuscripts

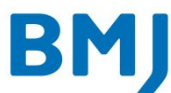

I, the Submitting Author has the right to grant and does grant on behalf of all authors of the Work (as defined in the below author licence), an exclusive licence and/or a non-exclusive licence for contributions from authors who are: i) UK Crown employees; ii) where BMJ has agreed a CC-BY licence shall apply, and/or iii) in accordance with the terms applicable for US Federal Government officers or employees acting as part of their official duties; on a worldwide, perpetual, irrevocable, royalty-free basis to BMJ Publishing Group Ltd ("BMJ") its licensees and where the relevant Journal is co-owned by BMJ to the co-owners of the Journal, to publish the Work in BMJ Open and any other BMJ products and to exploit all rights, as set out in our [licence](#).

The Submitting Author accepts and understands that any supply made under these terms is made by BMJ to the Submitting Author unless you are acting as an employee on behalf of your employer or a postgraduate student of an affiliated institution which is paying any applicable article publishing charge ("APC") for Open Access articles. Where the Submitting Author wishes to make the Work available on an Open Access basis (and intends to pay the relevant APC), the terms of reuse of such Open Access shall be governed by a Creative Commons licence – details of these licences and which [Creative Commons](#) licence will apply to this Work are set out in our licence referred to above.

Other than as permitted in any relevant BMJ Author's Self Archiving Policies, I confirm this Work has not been accepted for publication elsewhere, is not being considered for publication elsewhere and does not duplicate material already published. I confirm all authors consent to publication of this Work and authorise the granting of this licence.

1  
2  
3  
4 1 **A novel health systems service design checklist to improve healthcare access**  
5  
6  
7 2 **for marginalized, underserved communities in Europe**  
8  
9

10 3 Jeffrey V Lazarus,<sup>a</sup> Lee Baker<sup>b</sup>, Mario Cascio,<sup>c</sup> Denis Onyango,<sup>d</sup> Eberhard Schatz,<sup>e</sup> Alyna C Smith,<sup>f</sup>  
11  
12 4 Freek Spinnewijn,<sup>g</sup> on behalf of the Nobody Left Outside initiative  
13  
14

15 5 <sup>a</sup>Barcelona Institute for Global Health (ISGlobal), Hospital Clínic, University of Barcelona,  
16  
17 6 Barcelona, Spain  
18

19 7 <sup>b</sup>Interel, Brussels, Belgium  
20  
21

22 8 <sup>c</sup>European AIDS Treatment Group, Brussels Belgium  
23  
24

25 9 <sup>d</sup>Africa Advocacy Foundation, London, United Kingdom  
26  
27

28 10 <sup>e</sup>Correlation European Harm Reduction Network, Amsterdam, the Netherlands  
29

30 11 <sup>f</sup>Platform for International Cooperation on Undocumented Migrants (PICUM), Brussels, Belgium  
31  
32

33 12 <sup>g</sup>European Federation of National Organisations Working with the Homeless (FEANTSA), Brussels,  
34  
35 13 Belgium  
36

37 14 **Corresponding author:**

38  
39 15 Jeffrey Lazarus, Barcelona Institute for Global Health (ISGlobal), Hospital Clínic, University of  
40  
41 16 Barcelona, Calle de Rossellón 132, 4th floor, ES-08036, Barcelona, Spain.

42 17 [Jeffrey.Lazarus@isglobal.org](mailto:Jeffrey.Lazarus@isglobal.org)  
43  
44

45 18 **ORCID numbers**

46 19 Jeffrey V Lazarus: 0000-0001-9618-2299

47 20 Lee Baker: 0000-0001-5167-5305

48 21 Mario Cascio 0000-0001-6103-4130

49 22 Dennis Onyango: 0000-0002-5451-5419

50 23 Eberhard Schatz: 0000-0003-1636-790X

51 24 Alyna Smith: 0000-0002-3396-715X

52 25 Freek Spinnewijn: 0000-0002-2869-3385  
53  
54  
55

56 26 **Word count:** 3573 (body text)

57  
58 27 **Keywords:** Health services, Marginalized populations, Monitoring and evaluation, People-centred  
59  
60 28 health systems, Europe

## 1 **Abstract**

### 2 **Background**

3 Marginalized communities such as homeless people, people who use drugs (PWUD), lesbian, gay,  
4 bisexual, transgender and intersex people (LGBTI), prisoners, sex workers, and undocumented  
5 migrants are at high risk of poor health and yet face substantial barriers in accessing health and  
6 support services. The Nobody Left Outside (NLO) Service Design Checklist aims to promote a  
7 collaborative, evidence-based approach to service design and monitoring based on equity, non-  
8 discrimination and community engagement.

### 9 **Methods**

10 The Checklist was a collaborative project involving nine community advocacy organizations, with a focus  
11 on homeless people, PWUD, LGBTI people, prisoners, sex workers, and undocumented migrants. The  
12 Checklist was devised via a literature review; two NLO platform meetings; a multistakeholder policy  
13 workshop and an associated published concept paper; two conference presentations; and  
14 stakeholder consultation via a European Commission-led Thematic Network (including webinar).

### 15 **Results**

16 The NLO Checklist has six sections in line with the World Health Organization (WHO) Health Systems  
17 Framework. These are: 1) service delivery, comprising design state (six items), services provided (two  
18 items), accessibility and adaptation (16 items), peer support (two items); 2) health workforce (12  
19 items); 3) health information systems (seven items); 4) medical products and technologies (one  
20 item); 5) financing (three items); and 6) leadership and governance (seven items). It promotes the  
21 implementation of integrated (co-located or linked) healthcare services that are community-based  
22 and people-centred. These should provide a continuum of needs-based health promotion, disease  
23 prevention, diagnosis, treatment, and management, together with housing, legal and social support  
24 services, in alignment with the goals of universal health coverage and the WHO frameworks on  
25 integrated, people-centred healthcare.

## 1 **Conclusions**

2 The Checklist is offered as a practical tool to help overcome inequalities in access to health and  
3 support services. Policymakers, public health bodies, healthcare authorities, practitioner bodies,  
4 peer support workers and non-governmental organizations can use it when developing, updating or  
5 monitoring services for target groups. It may also assist civil society in wider advocacy efforts to  
6 improve access for underserved communities.

## 7 **Strengths and Limitations**

### 8 **Strengths:**

- 9 • The NLO Service Design Checklist is a versatile, easy-to-use, practical tool to help overcome  
10 inequalities in access to health and support services in alignment with principles of person-  
11 centricity and universal health coverage.
- 12 • The Checklist is broad in scope and hence applicable to services targeting multiple  
13 marginalized groups that often intersect and face common access barriers.
- 14 • The Checklist has been co-developed by community advocacy organizations and may help  
15 other advocacy organizations to collaboratively engage in service design and action plan  
16 formulation with key health agencies and health service providers.

### 17 **Limitations:**

- 18 • The Checklist is not universally applicable nor exhaustive.
- 19 • The Checklist has yet to be refined based on case studies of implementation.

## 20 **Background**

21 According to the principle of universal health coverage (UHC), all people should have access, without  
22 discrimination and exposure to financial hardship, to nationally determined, basic health services.<sup>1-2</sup>  
23 UHC encompasses health service delivery, human resources, health facilities, health technologies,  
24 information systems and communications networks, quality assurance mechanisms, governance and  
25 legislation, and financing.  
26

1  
2  
3 1 Even in the high-income countries of the European Union and the Organisation for Economic Co-  
4  
5 2 operation and Development (OECD) a large number of people are underserved by health systems.  
6  
7 3 This is particularly true for socially excluded people such as homeless people, people who use drugs  
8  
9 4 (PWUD), lesbian, gay, bisexual, transgender and intersex (LGBTI) people, prisoners, sex workers and  
10  
11 5 undocumented migrants. These communities are at a significantly higher risk of poor health than the  
12  
13 6 general population, owing to high levels of stress and precarious living conditions that can increase  
14  
15 7 their vulnerability to certain infectious diseases, such as HIV and viral hepatitis, mental health  
16  
17 8 conditions, maternal health problems, poor dental health and violence-related trauma.<sup>3 4 5 6 7 8</sup> In  
18  
19 9 high-income countries, most chronic non-communicable diseases are substantially more common  
20  
21 10 and have worse outcomes in marginalized groups, as compared with the general population.<sup>3 4 5</sup>  
22  
23  
24  
25  
26 11 Despite their risks of poor health, these marginalized communities face substantial challenges in  
27  
28 12 accessing health and support services owing to a complex interplay of educational, cultural,  
29  
30 13 organizational, administrative, economic and legal barriers, together with widespread stigma and  
31  
32 14 institutional discrimination.<sup>6 7 8 9 10 11</sup> Their general exclusion from healthcare planning and  
33  
34 15 monitoring processes results in a misalignment between service design and the needs of target  
35  
36 16 groups and contributes to poor health outcomes. An emergent approach termed “inclusion health”  
37  
38 17 aims to address such extreme health and social inequities.<sup>12</sup>  
39  
40  
41  
42  
43 18 The Nobody Left Outside (NLO) platform is a European coalition of organisations representing  
44  
45 19 marginalised underserved communities. Despite the complexity of the challenges they face in  
46  
47 20 accessing services, NLO partners have worked to create a framework for the delivery of care in a way  
48  
49 21 that addresses many of the overlapping needs of these communities. Designated as a 2019 Thematic  
50  
51 22 Network under the Health Policy Platform of the European Commission  
52  
53 23 (<https://webgate.ec.europa.eu/hpf/>), the NLO coalition published a Joint Statement on priority  
54  
55 24 measures to improve access to health and support services in October 2019.<sup>13</sup> Here, we describe the  
56  
57  
58  
59  
60



1 NLO Service Design Checklist, a novel tool to help key stakeholders tailor health services to  
2 marginalized communities.

### 3 **Methods**

4 Representatives of communities to whom a service is targeted should be involved in service design,  
5 or redesign, to help ensure that it addresses relevant barriers to access. Accordingly, the NLO Service  
6 Design Checklist aims to promote a collaborative and evidence-based approach to service design and  
7 monitoring. It is intended to help service providers, monitoring and evaluation experts, policymakers  
8 and target communities (e.g. civil society organizations and patient groups) to design and deliver  
9 health and support services that are accessible to underserved, marginalized people.

10 The Checklist was a collaborative project involving representatives of the following advocacy  
11 organizations working together as the NLO initiative: Africa Advocacy Foundation (AAF), Correlation  
12 European Harm Reduction Network, European AIDS Treatment Group (EATG), European Federation of  
13 National Organisations Working with the Homeless (FEANTSA), European Association for the Study of the  
14 Liver (EASL), Hepatitis C Trust, International Committee on the Rights of Sex Workers in Europe (ICRSE),  
15 International Lesbian, Gay, Bisexual, Trans and Intersex Association Europe (ILGA Europe), and the  
16 Platform for International Cooperation on Undocumented Migrants (PICUM), together with the  
17 Barcelona Institute for Global Health (ISGlobal). Representatives of each organization were involved  
18 during the conception, development, revision and final approval of the Checklist.

19 The Checklist was developed with particular reference to the following communities: homeless  
20 people, PWUD, LGBTI people, prisoners, sex workers and undocumented migrants – although its  
21 utility is not intended to be limited to these groups.

22 The Checklist was devised via the following steps: a literature search (via Pubmed and other online  
23 sources) regarding disease burden, barriers to accessing care, guidelines for interventions and  
24 system design and delivery); a published concept paper;<sup>14</sup> two NLO platform meetings (to define the

1 Checklist concept, structure and items) followed by multiple revision cycles and an open multi-  
2 stakeholder policy workshop at the European Health Forum Gastein 2017. The draft Checklist was  
3 then subject to further open stakeholder consultation via the 2019 NLO European Commission-led  
4 Thematic Network (including a webinar<sup>15</sup> and call for written feedback) and presentations at two  
5 conferences – an oral presentation at the International Conference on Integrated Care 2019<sup>16</sup> and an  
6 e-poster at Lisbon Addictions 2019.<sup>17</sup>

7 It is structured into six sections according to the World Health Organization (WHO) Health Systems  
8 Framework: service delivery, health workforce, health information systems, medical products and  
9 technologies, financing, and leadership and governance (Figure 1).<sup>18</sup> It also aligns broadly with the  
10 principles of the European Framework for Action on Integrated Health Services Delivery<sup>19</sup> and other  
11 recommendations.<sup>9 12 20 21 22 23 24</sup>

12 The Checklist serves as a guide and is not necessarily exhaustive. It will be freely available online (at  
13 [www.nobodyleftoutside.eu](http://www.nobodyleftoutside.eu)) as an open-access resource, together with a document designed to  
14 assist its implementation by providing further explanation, guidance, evidence and links to further  
15 resources. Users will be invited to report their experience and to provide feedback to help inform  
16 future editions.

## 17 Results

### 18 Service delivery

#### 19 Design stage

20 Marginalized groups are often described as ‘hard to reach’, whereas from their perspective, it is  
21 frequently the services that are hard to reach. Section A (Table 1) aims to aid the design and delivery  
22 of easily accessible services that meet the needs of target communities. Specifically, it promotes the  
23 implementation of integrated, co-located or linked healthcare services that are people-centred and  
24 which provide a continuum of relevant services, according to users’ needs, as called for by the WHO<sup>2</sup>

1 and the OECD.<sup>25</sup> It aligns with the principles of disease- and population-specific, yet broadly  
2 applicable, guidance on service design and delivery by the WHO and United Nations (UN).<sup>9 19 26</sup>

3 Among key considerations, service design should be based on an up-to-date assessment of:

- 4 • The specific needs and size of target communities (Checklist item A2)
- 5 • Existing access barriers, identified in consultation with the target community (A3) and healthcare  
6 staff (A4)
- 7 • Latest evidence-based clinical practice guidelines or best practices (A5) and existing resources  
8 and skills within target communities (A6).

#### 9 *Services provided*

10 Services targeting marginalized groups should provide convenient and efficient access to the range  
11 of health and social services needed by users (Table 2). Integrated (e.g. co-located or linked services)  
12 offer opportunities for multifaceted screening, care and support for health and social issues beyond  
13 the initial reason for contact, subject to individualized assessment (A8).

14 Harm reduction services (Table 2) are a priority among many marginalized communities and are  
15 essential to achieve the UN Sustainable Development Goals (SDGs) and WHO targets relevant to HIV  
16 and viral hepatitis<sup>22 23</sup> and yet are limited in most countries and settings, e.g. prisons.<sup>8</sup> Other health  
17 services of particular relevance include vaccination, sexual and reproductive health, mental health,  
18 dental care and maternal health. Many of these services correspond to indicators proposed by WHO  
19 to measure UHC<sup>2</sup> and among vulnerable communities are often subject to variations in access within  
20 Europe.

21 Access should also be provided to housing, which has an extremely important yet widely neglected  
22 impact on healthcare access and outcomes.<sup>5 12 27</sup> Access to legal services can often be critical also,

1  
2  
3 1 for example to undocumented migrants to help them understand their entitlement to care, to link  
4  
5 2 them to the healthcare system where possible, and to facilitate regularization of their status.<sup>28</sup>  
6  
7

### 8 3 *Accessibility and adaptation*

9  
10 4 Services should be designed to be easy to access and use by target communities. Services targeting  
11  
12 5 marginalized groups should be delivered primarily from community-based centres located  
13  
14 6 conveniently for users, supported by mobile outreach units where appropriate, rather than hospital-  
15  
16 7 based clinics (item A9).<sup>9 12 20 26</sup> Co-location of multiple services can further facilitate wider  
17  
18 8 engagement and uptake. Target communities can play a key role in designing, delivering and  
19  
20 9 assessing these services.  
21  
22  
23

24  
25 10 For example, PWUD – a population that is challenging to engage and retain in health services – often  
26  
27 11 use and trust harm reduction services, particularly when staffed by peers (people with lived  
28  
29 12 experience of challenges similar to those faced by the service user).<sup>29</sup> Moreover, such services offer  
30  
31 13 opportunities to provide wider healthcare, support and health education.<sup>20 26</sup> Engagement in care for  
32  
33 14 hepatitis C virus or HIV infection may in turn contribute to reducing risk behaviours and supporting  
34  
35 15 harm reduction. The Checkpoint centres across Europe<sup>30</sup> and the 56 Dean Street clinic in London<sup>31</sup>  
36  
37 16 offer examples of good practice in community-based HIV services targeting key populations. Service  
38  
39 17 models specifically targeting homeless people include integrated multi-professional services within  
40  
41 18 shelters or community-based outpatient clinics and mobile primary care outreach teams.<sup>32</sup>  
42  
43  
44  
45

46 19 Prisoners are another example of a group facing specific challenges in accessing healthcare. In  
47  
48 20 particular, access to secondary care may be limited by the prioritization of security measures over  
49  
50 21 healthcare services, while primary care services in prisons are often not provided to the same quality  
51  
52 22 as in the community. Prisons therefore represent an important opportunity for multifaceted public  
53  
54 23 health interventions, for example voluntary testing and care for sexually transmitted infections and  
55  
56 24 blood-borne viruses<sup>20 22 23</sup> and inter alia care for dental and mental health issues.  
57  
58  
59  
60

1 Checklist items A10–23 (Table 1) offer various additional practical considerations to improve  
2 accessibility to target groups, including free-of-charge access, confidentiality or anonymity,  
3 convenient opening hours and measures to support informed decision-making by users. Methods to  
4 further promote and monitor service engagement and adherence include sign-posting within target  
5 communities (item A22) and peer support work by community members (A25–26). Digital health  
6 tools, especially mobile phone apps, also show promise for this purpose.<sup>33 34 35</sup> For example, the  
7 Refaid app (<https://refaid.com>) shows migrants and refugees the location of nearby services.  
8 However, the evidence base supporting these interventions is limited at present, and care must be  
9 taken to ensure that their use does not contribute to widening health inequalities.

## 10 **Health workforce**

11 Health and social care providers often lack up-to-date, evidence-based education and training to  
12 deal with the complex challenges faced by marginalized communities and may lack evidence-based  
13 guidance and support structures. Discrimination within healthcare settings towards marginalized  
14 groups can also be an important barrier to access and can compromise care.<sup>36</sup> All staff members who  
15 serve such communities therefore require specific training on the health, social, economic and other  
16 relevant aspects necessary to enable them to effectively engage with and support service users  
17 (Table 3; items B1–B9). Better training of staff in non-health provider settings (such as homeless  
18 shelters) in such matters could also lead to earlier and better referrals to the healthcare system.

## 19 **Health information systems**

20 Accurate, relevant health information is required to support evidence-based policy and service  
21 design, and to ensure that services reach and benefit target communities. Numerous evidence gaps  
22 exist with respect to the effectiveness or cost-effectiveness of services for marginalized groups.  
23 Collecting data regarding the health of marginalized people can be difficult and national data  
24 collection systems are limited and heterogeneous between countries,<sup>6 7</sup> hampering international  
25 comparisons and benchmarking as well as national policymaking.

1  
2  
3 1 The Checklist items in this section (Table 3) aim to ensure that suitable systems are in place to  
4  
5 2 capture service users' feedback and measure service quality, and that people from target  
6  
7 3 communities (including but not limited to community advocacy organizations) are involved in this  
8  
9 4 process.

### 5 **Medical products & technologies**

6 In 2017, 12 agencies of the United Nations called on member states to put in place guarantees  
7  
8 against discrimination, as manifest when some individuals or groups are denied access to services  
9  
10 that are otherwise available to others – a key barrier to the achievement of the SDGs.<sup>36</sup> For example,  
11  
12 among PWUD and migrants in Europe, antiretroviral therapy for HIV is more likely to be delayed and  
13  
14 to show worse outcomes as compared to the general population.<sup>37 38</sup> Other examples include the  
15  
16 limited, uneven implementation of testing and evidence-based standard-of-care treatment for  
17  
18 hepatitis C virus infection among prisoners and PWUD<sup>39</sup> and to address the high levels of non-  
19  
20 communicable diseases among homeless people.<sup>3</sup>  
21  
22  
23  
24  
25  
26  
27  
28  
29  
30  
31  
32  
33  
34  
35  
36  
37  
38  
39  
40  
41  
42  
43  
44  
45  
46  
47  
48  
49  
50  
51  
52  
53  
54  
55  
56  
57  
58  
59  
60

14 Service design should be based on the fundamental principle of equity, whereby all protocols,  
15  
16 guidelines and policies should provide all service users with the same access to medical products and  
17  
18 technologies as everyone else, subject to need and according to the best standard of care that is  
19  
20 locally available (C1; Table 3).

### 18 **Financing**

19 Generally, healthcare interventions targeting underserved populations have been chronically  
20  
21 underfunded and treated as short-term and isolated projects. Items in this section (Table 4)  
22  
23 underscore that services should be adequately and sustainably financed based on an accurate, up-  
24  
25 to-date local needs assessment (E1) over a suitable timeframe, together with suitable impact  
26  
27 assessment.

1 Many states depend on donor funding to deliver some services targeting underserved groups – such  
2 as national HIV, viral hepatitis and tuberculosis programmes. Where donors have withdrawn  
3 support, it is vital that governments maintain equitable service delivery through sustainable health  
4 financing systems to avoid detrimental effects on public health.<sup>23 24</sup>

5 Health services for marginalized populations can be funded in a variety of ways, including by  
6 municipal, regional, national, European Union and international funding sources. In some instances,  
7 health can be funded through structural funds, which in the past have traditionally been associated  
8 with infrastructure. This would allow for fundamental change rather than short-term projects.

9 The value of investment in community-based services for underserved, marginalized people should  
10 be considered from an intersectoral perspective, i.e. taking into account the broader benefits of such  
11 services on public health objectives and social/welfare services (E3). Multifaceted community-based  
12 services can facilitate early diagnosis and interventions that can reduce healthcare costs associated  
13 with some key public health threats, while improving outcomes. In particular, providing access to  
14 routine primary care services has the potential to reduce the need for more expensive, unplanned  
15 emergency hospital care.

16 For example, harm reduction services to prevent bloodborne viruses are cost-effective.<sup>40</sup> In England,  
17 it is estimated that preventing only 1% of cases annually would save £15–19 million, while the  
18 annual costs of late HIV diagnosis are twice those of early diagnosis.<sup>41</sup> Policies and investment into  
19 harm reduction can also deliver broader social benefits, such as lower levels of drug-related crime  
20 and reduced pressure on criminal justice systems.

21 Evidence also clearly indicates that housing assistance for homeless people benefits health service  
22 utilization<sup>27 42</sup> although housing stability can cause an initial spike in healthcare use by allowing  
23 homeless people to properly connect with the health system. For example, housing interventions  
24 not only improve HIV care access and outcomes, but can also prevent new infections, supporting a

1  
2  
3 1 role in primary prevention.<sup>27</sup> Economic arguments also support the full provision of healthcare  
4  
5 2 services for undocumented migrants, i.e. not only in order to fulfil equity principles and health  
6  
7 3 objectives but also because timely provision of primary healthcare services is cost-saving over  
8  
9 4 hospital care.<sup>6 43–45</sup>

## 5 **Leadership and governance**

6 Governance to accelerate UHC involves transparent, inclusive and equitable decision-making  
7  
8 7 processes that allow for the input of all stakeholders and which develop policies that perform  
9  
10 8 effectively, reaching clear and measurable outcomes for all, building accountability and being fair.<sup>1</sup>  
11  
12 9 The NLO Checklist (Table 4) is intended to promote the involvement of people from target  
13  
14 10 communities and/or community advocacy organizations in the planning, delivery, leadership and  
15  
16 11 governance of services (F1), in general alignment with recommendations.<sup>6 7 9 26</sup> Various strategies  
17  
18 12 and tools can help empower community and patient populations toward this purpose.<sup>9 26 29 46</sup>  
19  
20 13 High-level political attention is needed to ensure that the appropriate legal frameworks are in place  
21  
22 14 to support healthcare access for all. The rights of all individuals to access to preventive healthcare  
23  
24 15 and to benefit from medical treatment under national laws and practices are enshrined in the  
25  
26 16 Charter of Fundamental Rights of the European Union<sup>47</sup> and other international instruments.<sup>48 49</sup>  
27  
28 17 Services should reflect international standards regarding human rights, equity, non-discrimination  
29  
30 18 and confidentiality (F2). Inequities in healthcare access should be addressed as part of  
31  
32 19 antidiscrimination and protective policies that foster a supportive legal framework and non-  
33  
34 20 discriminatory policy environment (F3). A Joint UN statement has called for member states to review  
35  
36 21 and repeal punitive laws proven to have negative health outcomes and that counter established  
37  
38 22 public health evidence.<sup>36</sup> Notably, in May 2019, the WHO adopted a 5-year global action plan aiming  
39  
40 23 to achieve UHC and the highest attainable standard of health for refugees and migrants together  
41  
42 24 with host populations<sup>50</sup>, and G7 Health Ministers committed to improve healthcare access for all,  
43  
44 25 including by strengthening primary healthcare.<sup>51</sup>



1  
2  
3 1 National disease-specific action plans are important to the achievement of SDGs, and yet are still not  
4  
5 2 present in many European Union countries, have important gaps, or frequently lack community  
6  
7 3 involvement.<sup>39</sup> Such national action plans are also important to tackle the broader deficits in access  
8  
9 4 in step with issues such as housing and other health determinants (F4).  
10  
11  
12  
13 5 Accountable, transparent leadership and governance is essential (F7). The call by the WHO Regional  
14  
15 6 Office for Europe call for enhanced national and local stewardship for implementation of the  
16  
17 7 strategies and action plans on migrant health<sup>6</sup>, and the recommendations by a Lancet Commission  
18  
19 8 for robust accountability and monitoring in the field of migrant health<sup>7</sup> also apply to those for other  
20  
21 9 marginalized communities. Notably, the 2018 Global Harm Reduction International study highlighted  
22  
23 10 poor transparency on harm reduction funding across Europe.<sup>52</sup>  
24  
25  
26  
27

## 28 11 **Discussion**

29  
30 12 Some of the people in Europe most in need of healthcare are amongst the least likely to receive it –  
31  
32 13 this may be considered an extreme example of Tudor Hart's Inverse Care Law.<sup>53</sup> To fulfil their  
33  
34 14 commitment to contribute to the health and wellbeing of all, and to reach the SDGs, governments at  
35  
36 15 all levels – national, regional and local – working together with civil society partners – should ensure  
37  
38 16 that nobody is left outside of their health system. Inequalities in access are not inevitable and can be  
39  
40 17 addressed by tailored, integrated service models. The NLO Service Design Checklist is offered as a  
41  
42 18 practical tool to support this process based on the principles of equity, non-discrimination and  
43  
44 19 community engagement.  
45  
46  
47  
48

49 20 Checklists have been successfully applied for clinical purposes in various settings. Notably, the WHO  
50  
51 21 Surgical Safety Checklist has been associated with reductions in surgical mortality.<sup>54</sup> The scope of our  
52  
53 22 Checklist includes direct considerations for service designers and frontline providers, together with  
54  
55 23 wider aspects of policy, funding and governance. It shares many common aspects with the WHO  
56  
57 24 Checklist for the framework for action on integrated health services<sup>19</sup>, including needs assessment,  
58  
59  
60

1  
2  
3 1 provision of a broad, multidisciplinary service, empowerment of target communities (i.e. providing  
4  
5 2 people with the necessary education, skills and resources they need to take control of their own  
6  
7 3 health and to play an active role in defining problems, decision-making and actions to manage their  
8  
9 4 health), workforce support, evidence generation on performance, and clear accountability. Our  
10  
11 5 Checklist focuses on certain marginalized communities, as for example do the UNAIDs Checklist for  
12  
13 6 community engagement in the implementation of guidelines on the sexual and reproductive rights  
14  
15 7 of women living with HIV<sup>55</sup> and a Public Health England Checklist of questions for healthcare  
16  
17 8 practitioners to consider when speaking to new migrant patients.<sup>56</sup>  
18  
19  
20  
21

22 9 The NLO Checklist was developed with particular attention to homeless people, PWUD, LGBTI  
23  
24 10 people, prisoners, sex workers and undocumented migrants, based on the expertise of participating  
25  
26 11 community organizations. While the Checklist is broad in scope, it is designed to allow  
27  
28 12 representatives of multiple marginalized groups that often intersect and face common access  
29  
30 13 barriers to collaboratively inform service design. As such, the Checklist is not intended to be  
31  
32 14 universally applicable, wholesale. Rather, it provides a range of considerations that may be used  
33  
34 15 flexibly for diverse purposes and adapted (with translation when needed) to particular settings. By  
35  
36 16 the same token, given its breadth and the commonality of many access barriers, we expect the  
37  
38 17 Checklist to have applications beyond the specific aforementioned communities.  
39  
40  
41  
42

43 18 We encourage researchers and other stakeholders to triangulate the Checklist versus existing available  
44  
45 19 documentation and best practices relevant to service design for target communities. Pilot studies are also  
46  
47 20 necessary to evaluate the functionality of the Checklist in practice. NLO participant organizations have  
48  
49 21 recently called on the European Commission to support a Pilot Programme to co-ordinate and evaluate  
50  
51 22 implementations of the Checklist in the context of delivering UHC in Europe.<sup>12 57</sup> NLO members are  
52  
53 23 considering applications with their own communities while raising awareness of the Checklist to promote  
54  
55 24 its use more broadly,<sup>57</sup> now with the support of the NLO Goodwill Ambassador, former European Union  
56  
57  
58  
59  
60

1  
2  
3 1 Commissioner for Health and Food Safety, Vytenis Andriukatis. Users are invited to report their  
4  
5 2 experience and to provide feedback via the NLO website ([www.nobodyleftoutside.eu](http://www.nobodyleftoutside.eu)).

6  
7  
8 3 We believe the Checklist will be of use to health service policymakers, public health bodies,  
9  
10 4 healthcare practitioner bodies and NGOs at all levels to use the Checklist when developing,  
11  
12 5 updating, monitoring or auditing national or regional service provision and action plans for target  
13  
14 6 groups. It may also assist regional or local healthcare authorities, service managers, and frontline  
15  
16 7 professionals and peer-support workers in the design, refinement or assessment of local services.

17  
18 8 The Checklist may also help community advocacy organizations to engage in service design and  
19  
20 9 action plan formulation with the aforementioned bodies (proactively or via consultation processes),  
21  
22 10 and in wider advocacy efforts to improve equitable access to health and support services.  
23  
24  
25  
26  
27

## 28 11 **Conclusion**

29  
30 12 The NLO Service Design Checklist is offered as a practical tool to help overcome Inequalities in access  
31  
32 13 to health and support services. We encourage health service policymakers, public health bodies,  
33  
34 14 healthcare authorities, healthcare practitioner bodies, peer support workers and non-governmental  
35  
36 15 organizations to use it when developing, updating or monitoring action plans and local services for  
37  
38 16 target groups. It may also assist civil society in wider advocacy efforts to improve access among  
39  
40 17 underserved communities.  
41  
42  
43  
44

## 45 18 **Abbreviations**

46  
47 19 HIV: human immunodeficiency virus.

48  
49  
50 20 LGBTI: lesbian, gay, bisexual, transgender and intersex

51  
52  
53 21 NLO: Nobody Left Outside.

54  
55  
56 22 OECD: Organisation for Economic Co-operation and Development.

57  
58  
59 23 PWUD: people who use drugs.  
60

1  
2  
3 1 SDG: Sustainable Development Goal.  
4

5  
6 2 UHC: universal health coverage.  
7

8  
9 3 UN: United Nations.  
10

11  
12 4 WHO: World Health Organization.  
13  
14

## 15 16 5 **Declarations**

### 17 18 6 **Ethics approval and consent to participate**

19  
20 7 Not applicable.  
21  
22

### 23 24 8 **Consent for publication**

25  
26 9 Not applicable.  
27  
28

### 29 30 10 **Availability of data and materials**

31  
32 11 Not applicable.  
33  
34

### 35 36 12 **Competing interests**

37 13 JVL reports research grants from AbbVie, Gilead and MSD, outside of the submitted work. LB is an  
38  
39 14 employee of Interel (Brussels, Belgium), which received fees from MSD as part of the grant supporting  
40  
41 15 the NLO initiative. MC, DO, ACS, ES and FS declare that they have no competing interests.  
42  
43

### 44 45 16 **Funding**

46  
47 17 The NLO initiative is supported by an unrestricted grant from MSD. JVL, MC, DO, ES, ACS, FS and the  
48  
49 18 individuals listed under 'Acknowledgements' participated in the NLO initiative on a volunteer (i.e.  
50  
51 19 non-remunerated) basis.  
52  
53

### 54 55 20 **Authors' contributions**

56  
57 21 JVL, LB, MC, DO, ES, ACS and FS, participated in the idea development, planning and creation of the  
58  
59 22 NLO Service Design Checklist at NLO meetings and review cycles, including at the European Health  
60

1 Forum in Gastein. JVL and LB led the drafting of this paper. JVL and FS led a European Commission  
2 Thematic Network webinar to discuss the Checklist. All authors reviewed and contributed to each  
3 draft and approved the final draft.

#### 4 **Licence Statement A**

5 I, the Submitting Author has the right to grant and does grant on behalf of all authors of the Work  
6 (as defined in the below author licence), an exclusive licence and/or a non-exclusive licence for  
7 contributions from authors who are: i) UK Crown employees; ii) where BMJ has agreed a CC-BY  
8 licence shall apply, and/or iii) in accordance with the terms applicable for US Federal Government  
9 officers or employees acting as part of their official duties; on a worldwide, perpetual, irrevocable,  
10 royalty-free basis to BMJ Publishing Group Ltd (“BMJ”) its licensees and where the relevant Journal is  
11 co-owned by BMJ to the co-owners of the Journal, to publish the Work in BMJ Open and any other  
12 BMJ products and to exploit all rights, as set out in our licence.

13  
14 The Submitting Author accepts and understands that any supply made under these terms is made by  
15 BMJ to the Submitting Author unless you are acting as an employee on behalf of your employer or a  
16 postgraduate student of an affiliated institution which is paying any applicable article publishing  
17 charge (“APC”) for Open Access articles. Where the Submitting Author wishes to make the Work  
18 available on an Open Access basis (and intends to pay the relevant APC), the terms of reuse of such  
19 Open Access shall be governed by a Creative Commons licence – details of these licences and  
20 which Creative Commons licence will apply to this Work are set out in our licence referred to above.

#### 21 **Acknowledgements**

22 Representatives of the following organizations participated in the NLO initiative toward  
23 development of the Service Design Checklist: African Advocacy Foundation (AAF: Denis Onyango);  
24 Barcelona Institute for Global Health (ISGlobal: Jeffrey V. Lazarus; Miguel Servet-funded associate  
25 research professor); Correlation European Harm Reduction Network (Eberhard Schatz and Roberto

1  
2  
3 1 Perez Gayo); European AIDS Treatment Group (EATG: Mario Cascio and Ann-Isabelle Von Lingen);  
4  
5 2 European Federation of National Organisations Working with the Homeless (FEANTSA: Freek  
6  
7 3 Spinnewijn); European Association for the Study of the Liver (EASL: Fiona Godfrey); Hepatitis C Trust  
8  
9  
10 4 (Rachel Halford); International Committee on the Rights of Sex Workers in Europe (ICRSE: Luca  
11  
12 5 Stevenson); International Lesbian, Gay, Bisexual, Trans and Intersex Association Europe (ILGA  
13  
14 6 Europe: Sophie Aujean and Katrin Hugendubel); Platform for International Cooperation on  
15  
16 7 Undocumented Migrants (PICUM: Alyna Smith).  
17  
18  
19

## 20 8 **References**

- 21  
22 9 1. Resolution adopted by the General Assembly on 12 December 2012: 67/81. Global health and  
23  
24 10 foreign policy. United Nations. 2013.  
25  
26 11 [https://www.un.org/en/ga/search/view\\_doc.asp?symbol=A/RES/67/81](https://www.un.org/en/ga/search/view_doc.asp?symbol=A/RES/67/81). Accessed 11 Feb 2020.  
27  
28  
29 12 2. Universal health coverage (UHC) website. World Health Organization.  
30  
31 13 [https://www.who.int/news-room/fact-sheets/detail/universal-health-coverage-\(uhc\)](https://www.who.int/news-room/fact-sheets/detail/universal-health-coverage-(uhc)). Accessed  
32  
33 14 11 Feb 2020.  
34  
35  
36 15 3. Fazel S, Geddes JR, Kushel M. The health of homeless people in high-income countries:  
37  
38 16 descriptive epidemiology, health consequences, and clinical and policy recommendations.  
39  
40 17 Lancet. 2014;384:1529–40.  
41  
42  
43 18 4. Fazel S, Baillargeon J. The health of prisoners. Lancet. 2011;377:956–65.  
44  
45  
46 19 5. Aldridge RW, Story A, Hwang SW, Nordentoft M, Luchenski SA, Hartwell G, et al. Morbidity and  
47  
48 20 mortality in homeless individuals, prisoners, sex workers, and individuals with substance use  
49  
50 21 disorders in high-income countries: a systematic review and meta-analysis.  
51  
52 22 Lancet. 2018;391:241–50.  
53  
54  
55 23 6. World Health Organization Regional Office for Europe. Report on the health of refugees and  
56  
57 24 migrants in the WHO European Region. No PUBLIC HEALTH without REFUGEE and MIGRANT  
58  
59  
60

- 1  
2  
3 1 HEALTH. 2018. [http://www.euro.who.int/\\_data/assets/pdf\\_file/0004/392773/ermh-eng.pdf](http://www.euro.who.int/_data/assets/pdf_file/0004/392773/ermh-eng.pdf).  
4  
5 2 Accessed 11 Feb 2020.  
6  
7  
8 3 7. Abubakar I, Aldridge RW, Devakumar D, Orcutt M, Burns R, Barreto M, et al. The UCL–Lancet  
9  
10 4 Commission on Migration and Health: the health of a world on the move. *Lancet*.  
11  
12 5 2018;392:2606–54.  
13  
14  
15 6 8. Joint United Nations Programme on HIV/AIDS (UNAIDS). Health, rights and drugs. Harm  
16  
17 7 reduction, decriminalization and zero discrimination for people who use drugs. 2019.  
18  
19 8 [https://www.unaids.org/en/resources/documents/2019/JC2954\\_UNAIDS\\_drugs\\_report\\_2019](https://www.unaids.org/en/resources/documents/2019/JC2954_UNAIDS_drugs_report_2019).  
20  
21 9 Accessed 11 Feb 2020.  
22  
23  
24 10 9. World Health Organization, United Nations Population Fund, Joint United Nations Programme  
25  
26 11 on HIV/AIDS, Global Network of Sex Work Projects, The World Bank. Implementing  
27  
28 12 comprehensive HIV/STI programmes with sex workers: practical approaches from collaborative  
29  
30 13 interventions. 2013.  
31  
32 14 [https://apps.who.int/iris/bitstream/handle/10665/90000/9789241506182\\_eng.pdf?sequence=1](https://apps.who.int/iris/bitstream/handle/10665/90000/9789241506182_eng.pdf?sequence=1)  
33  
34 15 . Accessed 11 Feb 2020.  
35  
36  
37  
38 16 10. Alencar Albuquerque G, de Lima Garcia C, da Silva Quirino G, Alves MJ, Belém JM, dos Santos  
39  
40 17 Figueiredo FW, et al. Access to health services by lesbian, gay, bisexual, and transgender  
41  
42 18 persons: systematic literature review. *BMC Int Health Hum Rights*. 2016;16:2.  
43  
44  
45  
46 19 11. Joint Action on HIV and Co-infection Prevention and Harm Reduction (HA-REACT). An  
47  
48 20 assessment of barriers to access to HIV and HCV services for people who inject drugs in Europe.  
49  
50 21 2019. [https://www.aidsactioneurope.org/en/publication/assessment-barriers-access-hiv-and-](https://www.aidsactioneurope.org/en/publication/assessment-barriers-access-hiv-and-hcv-services-people-who-inject-drugs-europe)  
51  
52 22 [hcv-services-people-who-inject-drugs-europe](https://www.aidsactioneurope.org/en/publication/assessment-barriers-access-hiv-and-hcv-services-people-who-inject-drugs-europe) Accessed 11 Feb 2020.  
53  
54  
55  
56  
57  
58  
59  
60

- 1  
2  
3 1 12. Luchenski S, Maguire N, Aldridge RW, Hayward A, Stort A, Perri P, et al. What works in inclusion  
4  
5 2 health: overview of effective interventions for marginalised and excluded populations. *Lancet*  
6  
7 3 2018;391:266–80  
8  
9  
10 4 13. Nobody Left Outside Thematic Network. Joint statement: Improving healthcare access for  
11  
12 5 marginalised people. 2019. [https://nobodyleftoutside.eu/wp-](https://nobodyleftoutside.eu/wp-content/uploads/NLO_Joint_Statement_08_01_2020_V2.2crop.pdf)  
13  
14 6 [content/uploads/NLO\\_Joint\\_Statement\\_08\\_01\\_2020\\_V2.2crop.pdf](https://nobodyleftoutside.eu/wp-content/uploads/NLO_Joint_Statement_08_01_2020_V2.2crop.pdf). Accessed 10 Feb 2019.  
15  
16  
17 7 14. Onyango D, Schatz E, Lazarus JV. Taking a ‘people-centred’ approach to improving access to  
18  
19 8 health care for underserved communities in Europe. *Eurohealth* 2017;23:23–7.  
20  
21 9 [http://www.euro.who.int/](http://www.euro.who.int/__data/assets/pdf_file/0004/349393/EH_v23n3_WEB_Final_12.Sept.2017.pdf?ua=1)  
22  
23 10 [\\_\\_data/assets/pdf\\_file/0004/349393/EH\\_v23n3\\_WEB\\_Final\\_12.Sept.](http://www.euro.who.int/__data/assets/pdf_file/0004/349393/EH_v23n3_WEB_Final_12.Sept.2017.pdf?ua=1)  
24  
25 11 [2017.pdf?ua=1](http://www.euro.who.int/__data/assets/pdf_file/0004/349393/EH_v23n3_WEB_Final_12.Sept.2017.pdf?ua=1). Accessed 11 Feb 2020.  
26  
27 11 15. NLO Service Design Checklist – First webinar of the Thematic Network led by Nobody Left  
28  
29 12 Outside platform (NLO). Webinar presentation, 16 May 2019.  
30  
31 13 [https://ec.europa.eu/health/sites/health/files/policies/videos/20190516\\_en.mp4](https://ec.europa.eu/health/sites/health/files/policies/videos/20190516_en.mp4). Accessed 11 Feb  
32  
33 14 2020  
34  
35  
36 15 16. Lazarus JV, Cascio M, Halford R, Onyango D, Schatz E, Smith A, et al.. Nobody Left Outside (NLO)  
37  
38 16 Checklist: Improving access to healthcare for vulnerable and underserved groups. *International*  
39  
40 17 *Journal of Integrated Care*. 2019;19(4):507.  
41  
42  
43 18 17. Schatz E. Nobody left outside: practical guidance and policy solutions to promote equity of  
44  
45 19 access for vulnerable and underserved communities to integrated health and social services,  
46  
47 20 including addiction care. *Lisbon Addictions* 2019, 23–25 October, Lisbon. Eposter 1011.  
48  
49 21 [https://www.lisbonaddictions.eu/lisbon-addictions-2019/presentations/nobody-left-outside-](https://www.lisbonaddictions.eu/lisbon-addictions-2019/presentations/nobody-left-outside-practical-guidance-and-policy-solutions-promote-equity-access)  
50  
51 22 [practical-guidance-and-policy-solutions-promote-equity-access](https://www.lisbonaddictions.eu/lisbon-addictions-2019/presentations/nobody-left-outside-practical-guidance-and-policy-solutions-promote-equity-access) Accessed 11 Feb 2020  
52  
53  
54 23 18. World Health Organization. Everybody business: strengthening health systems to improve health  
55  
56 24 outcomes: WHO’s framework for action. 2007.  
57  
58 25 [https://www.who.int/healthsystems/strategy/everybodys\\_business.pdf](https://www.who.int/healthsystems/strategy/everybodys_business.pdf). Accessed 11 Feb 2020  
59  
60



- 1  
2  
3 1 19. World Health Organization. Strengthening people-centred health systems in the WHO European  
4  
5 2 Region: Framework for action on integrated health services delivery. 2016.  
6  
7 3 [http://www.euro.who.int/\\_data/assets/pdf\\_file/0004/315787/66wd15e\\_FFA\\_IHSD\\_160535.pdf?ua=1](http://www.euro.who.int/_data/assets/pdf_file/0004/315787/66wd15e_FFA_IHSD_160535.pdf?ua=1). Accessed 11 Feb 2020  
8  
9 4  
10  
11  
12 5 20. World Health Organization. Consolidated guidelines on HIV prevention, diagnosis, treatment and  
13  
14 6 care for key populations. 2016.  
15  
16 7 [https://apps.who.int/iris/bitstream/handle/10665/246200/9789241511124-  
17  
18 eng.pdf;jsessionid=01DC589F5EADDA2DD6E298ADC09B4301?sequence=1](https://apps.who.int/iris/bitstream/handle/10665/246200/9789241511124-eng.pdf;jsessionid=01DC589F5EADDA2DD6E298ADC09B4301?sequence=1). Accessed 11 Feb  
19  
20 8  
21 9 2020  
22  
23  
24 10 21. World Health Organization Regional Office for Europe. Strategy and action plan for refugee and  
25  
26 11 migrant health in the WHO European Region. 2016.  
27  
28 12 [http://www.euro.who.int/\\_data/assets/pdf\\_file/0004/314725/66wd08e\\_MigrantHealthStrateg  
29  
30 yActionPlan\\_160424.pdf](http://www.euro.who.int/_data/assets/pdf_file/0004/314725/66wd08e_MigrantHealthStrategyActionPlan_160424.pdf). Accessed 11 Feb 2020.  
31  
32 13  
33  
34 14 22. World Health Organization Regional Office for Europe. Action plan for the health sector response  
35  
36 15 to viral hepatitis in the WHO European Region. 2017.  
37  
38 16 [http://www.euro.who.int/\\_data/assets/pdf\\_file/0008/357236/Hepatitis-9789289052870-  
39  
40 eng.pdf](http://www.euro.who.int/_data/assets/pdf_file/0008/357236/Hepatitis-9789289052870-eng.pdf). Accessed 11 Feb 2020.  
41  
42 17  
43  
44 18 23. World Health Organization Regional Office for Europe. Action plan for the health sector response  
45  
46 19 to HIV in the WHO European Region. 2017.  
47  
48 20 [http://www.euro.who.int/\\_data/assets/pdf\\_file/0007/357478/HIV-action-plan-en.pdf?ua=1](http://www.euro.who.int/_data/assets/pdf_file/0007/357478/HIV-action-plan-en.pdf?ua=1) .  
49  
50 21 Accessed 11 Feb 2020..  
51  
52  
53 22 24. Day E, Hellard M, Treloar C, Bruneau J, Martin NK, Øvrehus A, et al. International Network  
54  
55 23 on Hepatitis in Substance Users (INHSU). Hepatitis C elimination among people who inject drugs:  
56  
57 24 Challenges and recommendations for action within a health systems framework. *Liver*  
58  
59 25 *Int.* 2019;39:20–30.  
60

- 1  
2  
3 1 25. Organisation for Economic Co-operation and Development (OECD). The next generation of  
4  
5 2 health reforms: ministerial statement. 2017.  
6  
7 3 <http://www.oecd.org/health/ministerial/ministerial-statement-2017.pdf> . Accessed 11 Feb  
8  
9 4 2020.
- 10  
11  
12 5 26. United Nations Office on Drugs and Crime, International Network of People Who Use Drugs,  
13  
14 6 Joint United Nations Programme on HIV/AIDS, United Nations Development Programme, United  
15  
16 7 Nations Population Fund, World Health Organization, United States Agency for International  
17  
18 8 Development. Implementing comprehensive HIV and HCV programmes with people who inject  
19  
20 9 drugs: practical guidance for collaborative interventions. 2017.  
21  
22 10 [https://www.unaids.org/sites/default/files/media\\_asset/2017\\_HIV-HCV-programmes-people-](https://www.unaids.org/sites/default/files/media_asset/2017_HIV-HCV-programmes-people-who-inject-drugs_en.pdf)  
23  
24 11 [who-inject-drugs\\_en.pdf](https://www.unaids.org/sites/default/files/media_asset/2017_HIV-HCV-programmes-people-who-inject-drugs_en.pdf). Accessed 11 Feb 2020.
- 25  
26  
27 12 27. Baxter AJ, Tweed EJ, Katikireddi SV, Thomson H. Effects of Housing First approaches on health  
28  
29 13 and well-being of adults who are homeless or at risk of homelessness: systematic review and  
30  
31 14 meta-analysis of randomised controlled trials. *J Epidemiol Community Health*. 2019;73:379–87.
- 32  
33  
34 15 28. Smith AC, Krieger C, Siciarek M. The role of cities in the integration of migrants: facilitating  
35  
36 16 access to healthcare for all. Chapter 6 In: Villa M, editor. *Global Cities and Integration. A*  
37  
38 17 *Challenge for the Future*. Milan: ISPI; 2018. P. 129–154.  
39  
40 18 [https://www.ispionline.it/sites/default/files/pubblicazioni/globalcities\\_web.pdf](https://www.ispionline.it/sites/default/files/pubblicazioni/globalcities_web.pdf). Accessed 11  
41  
42 19 Feb 2020.
- 43  
44  
45 20 29. World Health Organization. One-to-one peer support by and for people with lived experience.  
46  
47 21 WHO QualityRights guidance module  
48  
49 22 [https://apps.who.int/iris/bitstream/handle/10665/329591/9789241516785-](https://apps.who.int/iris/bitstream/handle/10665/329591/9789241516785-eng.pdf?sequence=1&isAllowed=y)  
50  
51 23 [eng.pdf?sequence=1&isAllowed=y](https://apps.who.int/iris/bitstream/handle/10665/329591/9789241516785-eng.pdf?sequence=1&isAllowed=y) Accessed 11 Feb 2020  
52  
53  
54  
55  
56  
57  
58  
59  
60

- 1  
2  
3 1 30. Nikolopoulos GK, Chanos S, Tsiptsias E, Hodges-Mameletzis I, Paraskeva D, Dedes N. HIV  
4 incidence among men who have sex with men at a community-based facility in Greece. *Cent Eur*  
5  
6 2  
7  
8 3  
9  
10 4 31. Girometti N, McCormack S, Devitt E, Gedela K, Nwokolo N, Patel S, et al. Evolution of a pre-  
11  
12 5  
13 exposure prophylaxis (PrEP) service in a community-located sexual health clinic: concise report  
14  
15 6  
16 of the PrEPxpress. *Sex Health*. 2018;15:598–600.
- 17 7 32. Jego M, Abcaya J, Ştefan DE, Calvet-Montredon C, Gentile S. Improving health care management  
18  
19 8  
20 in primary care for homeless people: a literature review. *Int J Environ Res Public Health*. 2018;15  
21  
22 9  
23 (2):E309.
- 24 10 33. World Health Organization. WHO guideline: recommendations on digital interventions for health  
25  
26 11  
27 system strengthening. Geneva; WHO, 2019  
28  
29 12  
30 <https://apps.who.int/iris/bitstream/handle/10665/311941/9789241550505-eng.pdf?ua=1>  
31  
32 13  
33 Accessed 11 Feb 2020
- 34 14 34. Shrestha R, Altice FL, DiDomizio E, Sibilio B, Ranjit YS, Copenhaver MM. Feasibility and  
35  
36 15  
37 Acceptability of an mHealth-based approach as an HIV prevention strategy among people who  
38  
39 16  
40 use drugs on pre-exposure prophylaxis. *Patient Prefer Adherence* 2020;14:107–118.
- 41 17 35. Fernández-Gutiérrez M1, Bas-Sarmiento P, Poza-Méndez M. Effect of an mHealth intervention to  
42  
43 18  
44 improve health literacy in immigrant populations: a quasi-experimental study. *Comput Inform*  
45  
46 19  
47 *Nurs* 2019;37:142–150
- 48 20 36. Joint United Nations statement on ending discrimination in health care settings. Joint United  
49  
50 21  
51 Nations Programme on HIV/AIDS (UNAIDS), Office of the United Nations High Commissioner for  
52  
53 22  
54 Refugees (UNHCR), United Nations Children's Fund (UNICEF), World Food Programme (WFP),  
55  
56 23  
57 United Nations Development Programme (UNDP), United Nations Population Fund (UNFPA), et  
58  
59 24  
60 al. 2017. [https://www.unaids.org/sites/default/files/media\\_asset/ending-discrimination-healthcare-settings\\_en.pdf](https://www.unaids.org/sites/default/files/media_asset/ending-discrimination-healthcare-settings_en.pdf). Accessed 11 Feb 2020.

- 1  
2  
3 1 37. Saracino A, Lorenzini P, Lo Caputo, et al. Increased risk of virological failure to the first  
4  
5 2 antiretroviral regimen in HIV-infected migrants compared to natives: data from the ICONA  
6  
7 3 cohort. *Clin Microbiol Infect*. 2016;22:288.e.1-8.  
8  
9  
10 4 38. Saracino A, Zaccarelli M, Lorenzini P, Bandera A, Marchetti G, Castelli F, et al. Impact of social  
11  
12 5 determinants on antiretroviral therapy access and outcomes entering the era of universal  
13  
14 6 treatment for people living with HIV in Italy. *BMC Public Health*. 2018;18:870.  
15  
16  
17 7 39. Lazarus JV, Stumo SR, Harris M, Hendrickx G, Hetherington KL, Maticic M, et al; Hep-CORE Study  
18  
19 8 Group. Hep-CORE: a cross-sectional study of the viral hepatitis policy environment reported by  
20  
21 9 patient groups in 25 European countries in 2016 and 2017. *J Int AIDS Soc*. 2018;21 Suppl  
22  
23 10 2:e25052.  
24  
25  
26  
27 11 40. Wilson DP, Donald B, Shattock AJ, Wilson D, Fraser-Hurt N. The cost-effectiveness of harm  
28  
29 12 reduction. *Int J Drug Policy* 2015;26 (suppl 1):S5–S11.  
30  
31  
32 13 41. National Institute for Health and Care Excellence. Resource impact report: HIV testing: increasing  
33  
34 14 uptake among people who may have undiagnosed HIV (NG60). 2016.  
35  
36 15 <https://www.nice.org.uk/guidance/ng60/resources/resource-impact-report-pdf-2727796141>.  
37  
38 16 Accessed 11 Feb 2020.  
39  
40  
41 17 42. Lee CT, Winkvist A, Wiewel EW, Braunstein S, Jordan HT, Gould LH, et al. long-term supportive  
42  
43 18 housing is associated with decreased risk for new hiv diagnoses among a large cohort  
44  
45 19 of homeless persons in New York City. *AIDS Behav*. 2018;22:3083–3090.  
46  
47  
48 20 43. Trummer U, Novak-Zezula S, Renner A-T, Wilczewska I. Cost analysis of health care provision for  
49  
50 21 migrants and ethnic minorities. Vienna: Equi-Health; 2015.  
51  
52 22 [https://eea.iom.int/sites/default/files/publication/document/Cost\\_analysis\\_of\\_health\\_care\\_pro](https://eea.iom.int/sites/default/files/publication/document/Cost_analysis_of_health_care_provision_for_irregular_migrants_and_EU_citizens_without_insurance.pdf)  
53  
54 23 [vision\\_for\\_irregular\\_migrants\\_and\\_EU\\_citizens\\_without\\_insurance.pdf](https://eea.iom.int/sites/default/files/publication/document/Cost_analysis_of_health_care_provision_for_irregular_migrants_and_EU_citizens_without_insurance.pdf). Accessed 11 Feb 2020.  
55  
56  
57  
58  
59  
60

- 1  
2  
3 1 44. Bozorgmehr K, Razum O. Effect of restricting access to health care on health expenditures  
4 among asylum-seekers and refugees: a quasi-experimental study in Germany, 1994–2013. *PLoS*  
5 *One*. 2015;10:e0131483.  
6  
7  
8  
9  
10 4 45. European Union Agency for Fundamental Rights. Cost of exclusion from healthcare. The case of  
11 migrants in an irregular situation. 2015.  
12 [https://fra.europa.eu/sites/default/files/fra\\_uploads/fra-2015-cost-healthcare\\_en.pdf](https://fra.europa.eu/sites/default/files/fra_uploads/fra-2015-cost-healthcare_en.pdf). Accessed  
13 11 Feb 2020.  
14  
15  
16  
17  
18  
19 8 46. Ferrer L. Engaging patients, carers and communities for the provision of co-ordinated/integrated  
20 health services: strategies and tools. Copenhagen: World Health Organization Regional Office for  
21 Europe. 2015. [http://www.euro.who.int/](http://www.euro.who.int/__data/assets/pdf_file/0004/290443/Engaging-patients-carers-communities-provision-coordinated-integrated-health-services.pdf)  
22 [\\_\\_data/assets/pdf\\_file/0004/290443/Engaging-](http://www.euro.who.int/__data/assets/pdf_file/0004/290443/Engaging-patients-carers-communities-provision-coordinated-integrated-health-services.pdf)  
23 [patients-carers-communities-provision-coordinated-integrated-health-services.pdf](http://www.euro.who.int/__data/assets/pdf_file/0004/290443/Engaging-patients-carers-communities-provision-coordinated-integrated-health-services.pdf). Accessed 11  
24 Feb 2020.  
25  
26  
27  
28  
29  
30  
31 13 47. European Commission. Charter of fundamental rights of the European Union (2012C 326/02).  
32 2012. <https://eur-lex.europa.eu/legal-content/EN/TXT/?uri=CELEX:12012P/TXT>. Accessed 11 Feb  
33 2020.  
34  
35  
36  
37  
38 16 48. World Medical Association. WMA Resolution on refugees and migrants. Adopted by the 67th  
39 World Medical Assembly, Taipei, Taiwan, 2016. 2016. [https://www.wma.net/policies-post/wma-](https://www.wma.net/policies-post/wma-resolution-on-refugees-and-migrants/)  
40 [resolution-on-refugees-and-migrants/](https://www.wma.net/policies-post/wma-resolution-on-refugees-and-migrants/). Accessed 11 Feb 2020.  
41  
42  
43  
44  
45 19 49. United Nations Committee on Economic, Social and Cultural Rights. Duties of States towards  
46 refugees and migrants under the International Covenant on Economic, Social and Cultural Rights.  
47 2017.  
48 <http://docstore.ohchr.org/SelfServices/FilesHandler.ashx?enc=4slQ6QSmIBEDzFEovLCuW1AVC1>  
49 [NkPsgUedPIF1vfPMJbFePxX56jVyNBwivepPdIEe4%2BUb4qsdJhuBDpCRSOwCXPjZ7VN7SXN0oRo](http://docstore.ohchr.org/SelfServices/FilesHandler.ashx?enc=4slQ6QSmIBEDzFEovLCuW1AVC1)  
50 [XkZhCuB9Z73iyU35LZveUjX0d7u](http://docstore.ohchr.org/SelfServices/FilesHandler.ashx?enc=4slQ6QSmIBEDzFEovLCuW1AVC1). Accessed 11 Feb 2020.  
51  
52  
53  
54  
55  
56  
57  
58  
59  
60

- 1  
2  
3 1 50. World Health Organization. Promoting the health of refugees and migrants. Draft global action  
4 plan 2019–2023. 72<sup>nd</sup> World Health Assembly. 2019.  
5  
6 2  
7 3  
8 [http://apps.who.int/gb/ebwha/pdf\\_files/WHA72/A72\\_25Rev1-en.pdf](http://apps.who.int/gb/ebwha/pdf_files/WHA72/A72_25Rev1-en.pdf). Accessed 11 Feb 2020.  
9  
10 4 51. G7 Health Ministers. Ensuring access to health for all. 2019.  
11  
12 5  
13 [https://www.elysee.fr/admin/upload/default/0001/05/59c3454ab28edc451be46e846b70dc38a](https://www.elysee.fr/admin/upload/default/0001/05/59c3454ab28edc451be46e846b70dc38a532db95.pdf)  
14 [532db95.pdf](https://www.elysee.fr/admin/upload/default/0001/05/59c3454ab28edc451be46e846b70dc38a532db95.pdf). Accessed 11 Feb 2020.  
15 6  
16  
17 7 52. Stone K, Shirley-Beavan S. Global State of Harm Reduction 2018. London: Harm Reduction  
18 International; 2018. <https://www.hri.global/global-state-harm-reduction-2018> Accessed 11 Feb  
19 8  
20 2020  
21 9  
22  
23  
24 10 53. Tudor Hart J. The inverse care law. *Lancet* 1971;297:407–12  
25  
26  
27 11 54. GlobalSurg Collaborative. Pooled analysis of WHO Surgical Safety Checklist use and mortality  
28 after emergency laparotomy. *Br J Surg*. 2019;106:e103–e112.  
29  
30 12  
31  
32 13 55. International Community of Women Living with HIV Latina, Sophia, Eurasian Women’s Network  
33 on AIDS, International Community of Women Living with HIV West Africa, MENA Rosa,  
34 International Community of Women Living with HIV & AIDS Eastern Africa, et al. Translating  
35 14  
36 15  
37 16  
38 17  
39 18  
40 19  
41 20  
42 21  
43 22  
44 23  
45  
46 [https://www.unaids.org/sites/default/files/media\\_asset/who\\_srhr\\_guideline\\_checklist\\_en.pdf](https://www.unaids.org/sites/default/files/media_asset/who_srhr_guideline_checklist_en.pdf).  
47  
48 20  
49  
50 21 56. Public Health England. Assessing new patients from overseas: migrant health guide. 2019.  
51  
52 22  
53 [https://www.gov.uk/guidance/assessing-new-patients-from-overseas-migrant-health-](https://www.gov.uk/guidance/assessing-new-patients-from-overseas-migrant-health-guide#checklist-for-new-migrant-patients)  
54 [guide#checklist-for-new-migrant-patients](https://www.gov.uk/guidance/assessing-new-patients-from-overseas-migrant-health-guide#checklist-for-new-migrant-patients). Accessed 11 Feb 2020.  
55  
56  
57  
58  
59  
60

- 1 57. Lazarus JV, Onyango D, Spinnewijn F. Leaving nobody outside our healthcare systems—in Europe  
 2 or elsewhere. BMJ Opinion 25 November 2019 [https://blogs.bmj.com/bmj/2019/11/25/leaving-  
 4 nobody-outside-our-healthcare-systems-in-europe-or-elsewhere/](https://blogs.bmj.com/bmj/2019/11/25/leaving-<br/>
  3 nobody-outside-our-healthcare-systems-in-europe-or-elsewhere/) Accessed 10 February 2020

5 Table 1. Nobody Left Outside Service Design Checklist – section A: service delivery  
 6

| <b>A. Service delivery</b><br><b>Aim: Design and deliver an easily accessible service that meets the needs of the communities for whom it is intended.</b><br>Relevance: Providers ✓✓ Policymakers ✓ | Yes | No | Not relevant /<br>Comments |
|------------------------------------------------------------------------------------------------------------------------------------------------------------------------------------------------------|-----|----|----------------------------|
| <b>DESIGN STAGE</b>                                                                                                                                                                                  |     |    |                            |
| A1. Were people from the target community involved in the design of the service?                                                                                                                     |     |    |                            |
| Has the design of the service taken into account the:                                                                                                                                                |     |    |                            |
| A2. Health and social care needs of the community?                                                                                                                                                   |     |    |                            |
| A3. Existing barriers to service access for the community, identified by the community and/or service users?                                                                                         |     |    |                            |
| A4. Existing barriers identified by healthcare staff in delivering services to the community?                                                                                                        |     |    |                            |
| A5. Existing resources and skills within the community?                                                                                                                                              |     |    |                            |
| A6. Relevant clinical practice guidelines and/or best practices?                                                                                                                                     |     |    |                            |
|                                                                                                                                                                                                      |     |    |                            |

|                                                                                                                                                                                                                                   |  |  |  |
|-----------------------------------------------------------------------------------------------------------------------------------------------------------------------------------------------------------------------------------|--|--|--|
| <b>SERVICES PROVIDED</b>                                                                                                                                                                                                          |  |  |  |
| A7. Does the service provide integrated access (co-located or linked) to the range of health services (including testing, treatment, prevention and supportive care), social services and legal services needed by the community? |  |  |  |
| A8. Are the physical and psychological needs of each service user systematically assessed on an individualized basis and in an appropriate manner?                                                                                |  |  |  |
|                                                                                                                                                                                                                                   |  |  |  |
| <b>ACCESSIBILITY AND ADAPTATION</b>                                                                                                                                                                                               |  |  |  |
| Is the service made easy to access and use by the community by:                                                                                                                                                                   |  |  |  |
| A9. Providing community-based and/or mobile clinics?                                                                                                                                                                              |  |  |  |
| A10. Having convenient opening hours?                                                                                                                                                                                             |  |  |  |
| A11. Providing child-friendly waiting areas?                                                                                                                                                                                      |  |  |  |

|    |                                                                                               |  |  |
|----|-----------------------------------------------------------------------------------------------|--|--|
| 1  |                                                                                               |  |  |
| 2  |                                                                                               |  |  |
| 3  |                                                                                               |  |  |
| 4  | A12. Providing physical accessibility for people with reduced mobility?                       |  |  |
| 5  | A13. Providing accessible sex- or gender-segregated spaces and services that are safe         |  |  |
| 6  | and accessible for trans, non-binary and intersex persons?                                    |  |  |
| 7  |                                                                                               |  |  |
| 8  | A14. Being provided on an anonymous or confidential basis?                                    |  |  |
| 9  |                                                                                               |  |  |
| 10 | A15. Not requiring users to provide formal identification to access the service?              |  |  |
| 11 |                                                                                               |  |  |
| 12 | A16. Being free-of-charge to users?                                                           |  |  |
| 13 |                                                                                               |  |  |
| 14 | A17. Providing user-friendly information in plain language on the available health,           |  |  |
| 15 | social and legal services and users' rights to access these, translated into relevant         |  |  |
| 16 | languages and sufficient for them to make informed choices?                                   |  |  |
| 17 |                                                                                               |  |  |
| 18 | A18. Being suitably tailored to be sensitive to users' <b>sexuality, ethnicity, migration</b> |  |  |
| 19 | <b>status</b> , culture, faith, gender, housing status and lifestyle?                         |  |  |
| 20 |                                                                                               |  |  |
| 21 | A19. Allowing users the option to choose which gender of staff member they see?               |  |  |
| 22 |                                                                                               |  |  |
| 23 | A20. Providing trained interpreters for relevant languages during consultations?              |  |  |
| 24 |                                                                                               |  |  |
| 25 | A21. Offering users assistance with completing forms or other documents?                      |  |  |
| 26 |                                                                                               |  |  |
| 27 | A22. Being promoted and signposted effectively within the community?                          |  |  |
| 28 |                                                                                               |  |  |
| 29 | A23. Providing incentives (e.g. financial) for users to use the service?                      |  |  |
| 30 |                                                                                               |  |  |
| 31 | A24. Using digital tools with evidence of benefit to help link people to care?                |  |  |
| 32 |                                                                                               |  |  |
| 33 |                                                                                               |  |  |
| 34 | <b>PEER SUPPORT</b>                                                                           |  |  |
| 35 |                                                                                               |  |  |
| 36 | A25. Does the service use peer care and support by community members?                         |  |  |
| 37 |                                                                                               |  |  |
| 38 | A26. Are peer support workers adequately compensated for their services?                      |  |  |

1



1 Table 2. Range of services that may be required by people from marginalized, underserved  
 2 communities targeted by the Nobody Left Outside Service Design Checklist

|                                                                                                                                                       |  |
|-------------------------------------------------------------------------------------------------------------------------------------------------------|--|
| Harm reduction:                                                                                                                                       |  |
| • Opioid substitution therapy                                                                                                                         |  |
| • Needle and syringe exchange                                                                                                                         |  |
| • Alcohol and substance abuse interventions                                                                                                           |  |
| • Infectious diseases testing (with appropriate counselling), linked to treatment services – including for HIV, hepatitis B and C virus, tuberculosis |  |
| • Vaccination and other prevention approaches                                                                                                         |  |
| • Condom distribution                                                                                                                                 |  |
| • Wound care                                                                                                                                          |  |
| Other health services:                                                                                                                                |  |
| • Sexual and reproductive health services (including screening, diagnosis and treatment of sexually transmitted diseases, cervical cancer screening)  |  |
| • Dental care                                                                                                                                         |  |
| • Maternity care services (including conception and pregnancy care)                                                                                   |  |
| • Mental health services                                                                                                                              |  |
| • Health promotion education                                                                                                                          |  |
| Social and support services:                                                                                                                          |  |
| • Housing or shelter support                                                                                                                          |  |
| • Social and welfare services                                                                                                                         |  |
| • Legal support services                                                                                                                              |  |

3  
4

1  
2  
3 Table 3. Nobody Left Outside Service Design Checklist – section B (health workforce), C (health  
4 information systems) and D (medical products and technologies).  
5  
6  
7

| <b>B. Health workforce</b>                                                                                                                             | Yes | No | Not relevant / Comments |
|--------------------------------------------------------------------------------------------------------------------------------------------------------|-----|----|-------------------------|
| <b>Aim: Prevent and address discrimination and ensure workforce is enabled to deliver the service.</b><br>Relevance: Providers ✓✓ Policymakers ~       |     |    |                         |
| Do <i>all</i> staff members receive education and training on:                                                                                         |     |    |                         |
| B1. Health and social care needs and challenges among underserved communities?                                                                         |     |    |                         |
| B2. Users' rights to health and social services, and principles of non-discriminatory equal access?                                                    |     |    |                         |
| B3. Sensitivity regarding relevant cultural, faith, gender and lifestyle matters among user communities?                                               |     |    |                         |
| B4. Communication skills (including appropriate terminology)?                                                                                          |     |    |                         |
| B5. Stress management?                                                                                                                                 |     |    |                         |
| B6. Conflict management?                                                                                                                               |     |    |                         |
| B7. Do healthcare staff receive suitable training to deliver the necessary services according to current evidence-based guidelines and best practices? |     |    |                         |
| B8. Is the training provided to healthcare staff accredited for continuing medical education (CME)?                                                    |     |    |                         |
| B9. Are peer support workers given suitable training to fulfil their roles?                                                                            |     |    |                         |
| B10: Are healthcare staff and peer support workers given peer-to-peer support, supervision or psychological aid, if necessary?                         |     |    |                         |
| Do workforce training programmes include contributions from:                                                                                           |     |    |                         |
| B11. Community representatives?                                                                                                                        |     |    |                         |
| B12. Professional peers ('champions')?                                                                                                                 |     |    |                         |
|                                                                                                                                                        |     |    |                         |
| <b>C. Health information systems</b>                                                                                                                   | Yes | No | Not relevant / Comments |
| <b>Aim: Check that the service is used by the community and meets users' needs.</b><br>Relevance: Providers ✓✓ Policymakers ✓                          |     |    |                         |
| C1. Are community representatives involved in how the service is assessed?                                                                             |     |    |                         |
| Are suitable systems in place to monitor the:                                                                                                          |     |    |                         |
| C2. Usage of the service by the communities?                                                                                                           |     |    |                         |
| C3. Quality and impact of the service provided?                                                                                                        |     |    |                         |
| C4. Is there a formal process to capture users' feedback on the service, including complaints?                                                         |     |    |                         |
| C5. Are feedback loops in place to ensure that monitoring and user feedback help to improve the service?                                               |     |    |                         |
| C6. Are data gathered (with informed consent where appropriate and in a data protection-compliant manner) for research and advocacy purposes?          |     |    |                         |
| C7. Does the service apply quality standards?                                                                                                          |     |    |                         |
|                                                                                                                                                        |     |    |                         |

| <b>D. Medical products &amp; technologies</b><br><b>Aim: Ensure that all service users have equitable access to care.</b><br>Relevance: Providers ✓✓ Policymakers ✓✓                                                                            | Yes | No | Not relevant / Comments |
|-------------------------------------------------------------------------------------------------------------------------------------------------------------------------------------------------------------------------------------------------|-----|----|-------------------------|
| D1. Do care protocols, guidelines and policies provide all service users with equitable and barrier-free access to medical products and technologies according to the best possible, evidence-based standard of care that is locally available? |     |    |                         |

1

For peer review only

1  
2  
3 1 Table 4. Nobody Left Outside Service Design Checklist – section E (financing) and F (leadership and  
4 2 governance).  
5 3  
6

| <b>E. Financing</b><br><b>Aim: Ensure the service is adequately and sustainably resourced.</b><br><b>Relevance: Providers ✓ Policymakers ✓✓</b>                               | Yes | No | Not relevant /<br>Comments |
|-------------------------------------------------------------------------------------------------------------------------------------------------------------------------------|-----|----|----------------------------|
| E1. Are services adequately financed based on an accurate, up-to-date local needs assessment?                                                                                 |     |    |                            |
| E2. Is the service sustainably financed for a suitable timeframe?                                                                                                             |     |    |                            |
| E3. Does service financing take an intersectoral perspective based on the needs of the community?                                                                             |     |    |                            |
|                                                                                                                                                                               |     |    |                            |
| <b>F. Leadership &amp; governance</b><br><b>Aim: Ensure service is suitably led and governed, with community involvement</b><br><b>Relevance: Providers ~ Policymakers ✓✓</b> |     |    |                            |
| F1. Are community representatives involved in the leadership and governance of the service?                                                                                   |     |    |                            |
| F2. Does the service reflect international standards regarding human rights, equity, non-discrimination and confidentiality?                                                  |     |    |                            |
| F3. Is there a supportive legal framework and policy environment?                                                                                                             |     |    |                            |
| F4. Is there a National Action Plan regarding health and social care for the community, developed with involvement of the community?                                          |     |    |                            |
| F5. Is the service operated under the Health authorities (rather than the Interior or Justice authorities)?                                                                   |     |    |                            |
| F6. Do Health and Social Services authorities, and relevant government agencies, collaborate in the delivery of the service?                                                  |     |    |                            |
| F7. Does the service have accountable, transparent leadership and governance?                                                                                                 |     |    |                            |

4  
5  
6  
7  
8  
9  
10  
11  
12  
13  
14  
15  
16  
17  
18  
19  
20  
21  
22  
23  
24  
25  
26  
27  
28  
29  
30  
31  
32  
33  
34  
35  
36  
37  
38  
39  
40  
41  
42  
43  
44  
45  
46  
47  
48  
49  
50  
51  
52  
53  
54  
55  
56  
57  
58  
59  
60

1  
2  
3 1 **Figure legend**  
4

- 5 2 Figure 1. Schematic overview of Nobody Left Outside (NLO) Service Design Checklist, based on the  
6  
7 3 World Health Organization Health Systems Framework.<sup>18</sup>  
8  
9  
10  
11  
12  
13  
14  
15  
16  
17  
18  
19  
20  
21  
22  
23  
24  
25  
26  
27  
28  
29  
30  
31  
32  
33  
34  
35  
36  
37  
38  
39  
40  
41  
42  
43  
44  
45  
46  
47  
48  
49  
50  
51  
52  
53  
54  
55  
56  
57  
58  
59  
60

For peer review only

Figure 1

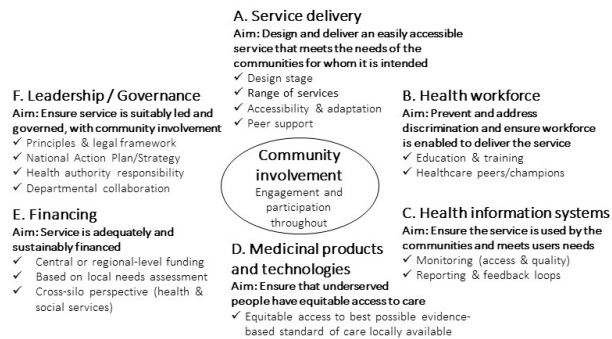

Figure 1- JPEG

338x190mm (96 x 96 DPI)
